1 **Regulatory cross-talk supports resistance to Zn intoxication in**  
2 ***Streptococcus***

3 Matthew J. Sullivan, Kelvin G. K. Goh and Glen C. Ulett\*

4 School of Medical Sciences, and Menzies Health Institute Queensland, Griffith University,  
5 Parklands, Australia 4222

6 **Short title:** Regulatory cross-talk supports resistance to Zn intoxication in *Streptococcus*

7 \*Correspondence: Professor Glen C. Ulett.

8 **Email:** [g.ulett@griffith.edu.au](mailto:g.ulett@griffith.edu.au)

9 **Author Contributions:** M. J. S., G. C. U. conceived and designed the research. M. J. S., K. G. K.  
10 G., G. C. U. constructed the *S. agalactiae* mutants, M. J. S. performed the transcriptomic  
11 analyses, ICP-OES, phenotypic assays, cell and animal experiments and microscopy. K. G. K. G.  
12 performed the TraDIS experiments. M. J. S., K. G. K. G., G. C. U. discussed the results and wrote  
13 the manuscript together. All authors reviewed and edited the manuscript.

14 **Competing Interest Statement:** All authors report no conflict of interest to declare.

15 **Classification:** Biological Sciences; Microbiology.

16 **Keywords:** metal ions; *Streptococcus*; copper; zinc; bacterial pathogenesis

17

## 18 **Abstract**

19 Metals such as copper (Cu) and zinc (Zn) are important trace elements that can effect bacterial  
20 cell physiology but can also intoxicate bacteria at high concentrations. Discrete genetic systems  
21 for management of Cu and Zn efflux have been described in several bacteria pathogens, including  
22 streptococci. However, insight into molecular cross-talk between systems for Cu and Zn  
23 management in bacteria that drive metal detoxification, is limited. Here, we describe a biologically  
24 consequential cross-system effect of metal management in group B *Streptococcus* (GBS)  
25 governed by the Cu-responsive *copY* regulator in response to Zn. RNAseq analysis of wild-type  
26 (WT) and *copY*-deficient GBS exposed to metal stress revealed unique transcriptional links  
27 between the systems for Cu and Zn detoxification. We show that the Cu-sensing functions of  
28 CopY extend beyond Cu, and enable CopY to regulate Cu and Zn stress responses to effect  
29 genes involved in central cellular processes, including riboflavin synthesis. CopY also contributed  
30 to supporting GBS virulence *in vivo* following infection of mice. Identification of the Zn resistome  
31 of GBS using TraDIS revealed a suite of genes essential for GBS growth in metal stress. Several  
32 of the genes identified are novel to systems that support bacterial survival in metal stress, and  
33 represent a diversity of mechanisms of microbial metal homeostasis during cell stress. Overall,  
34 this study reveals a new and important mechanism of cross-system complexity driven by CopY in  
35 bacteria to regulate cell management of metal stress and survival.

## 36 **Author Summary**

37 Metals, such as Cu and Zn, can be used by the mammalian immune system to target bacterial  
38 pathogens, and consequently, bacteria have evolved discrete genetic systems that subvert this  
39 host-derived antimicrobial response. Systems for Cu and Zn homeostasis are well characterized,  
40 including the transcriptional control of sensing and responding to metal stress. Here we have  
41 discovered novel features of metal response systems in *Streptococcus* that have major  
42 implications for pathogenesis and virulence. We show that *Streptococcus* resists Zn intoxication  
43 by utilizing a *bona fide* Cu regulator, CopY, to maintain cellular metal homeostasis, which enables  
44 the bacteria to survive stressful conditions. We identify new genes in *Streptococcus* that confer

45 resistance to zinc intoxication, including several that have not previously been linked to metal ion  
46 homeostasis in any bacterium. The identification of cross-system metal management and new  
47 resistance mechanisms enhances our understanding of metal ion homeostasis in bacteria and its  
48 effect on pathogenesis.  
49

## 50 **Introduction**

51 In prokaryotic and eukaryotic cells, copper (Cu) and zinc (Zn) are important cofactors for  
52 metalloenzymes [1, 2]. When present in excess, however, Cu and Zn can cause cellular toxicity  
53 and, for example, can exert antimicrobial effects in subcellular areas within infected phagocytic  
54 cells [3, 4]. The double-edged sword of supporting cell physiology versus toxicity of Cu and Zn  
55 offers potential antimicrobial benefit for the control of bacterial pathogens and is of interest in  
56 studies of host-pathogen interactions [5-7]. On the one hand, Cu intoxication in bacteria can  
57 reflect enzyme inactivation, deregulation of metabolism, and/or redox stress, such as higher  
58 potential to generate reactive oxygen species [8]. Zn intoxication can reflect an ablation of uptake  
59 of essential manganese (Mn) [9], which can compromise the bacterial cell response to oxidative  
60 stress [10]; Zn can also disrupt central carbon metabolism [11]. Phagocytes such as macrophages  
61 and neutrophils can mobilise intracellular pools of Cu and Zn to pro-actively expose internalized  
62 bacteria to metal conditions that are antimicrobial [5, 12, 13]. In some pathogenic bacteria, this  
63 can be counteracted by activation of metal efflux mechanisms to thwart metal intoxication [14].

64

65 In bacteria, adaptation to metal excess and limitation is complex, but several defined systems are  
66 based on efflux proteins including P-type ATPases, which confer resistance to metal stress in  
67 different pathogens [1, 3]. In streptococci, discrete genetic systems for cellular management of  
68 Cu and Zn homeostasis act via the regulation of metal import and export machinery [9, 15, 16]; a  
69 system for Cu efflux utilizes the canonical *cop* operon, encompassing *copA* that encodes a  
70 ATPase efflux pump that extrudes cellular Cu ions, alongside a Cu-specific transcriptional regulator  
71 *copY*, that represses the operon [17, 18]. A system for Zn efflux uses a Zn-specific transcriptional  
72 response regulator, *sczA*, to control a Zn efflux transporter, encoded by *czcD* [15, 19]. These two  
73 systems of *copA-copY* and *czcD-sczA* for Cu and Zn export, respectively, have recently been  
74 characterized in group B *Streptococcus* (GBS), which responds to excess Cu and Zn by de-

75 repressing *copA* via CopY to drive Cu export from the cell [20], and by activating *czcD* via SczA  
76 to regulate intracellular Zn levels [21], respectively.

77

78 Molecular cross-talk between microbial Cu and Zn management systems can be proposed by  
79 several observations reported in prior studies of different pathogens. Zn was shown to bind CopY  
80 in *Enterococcus* [22], and was linked with a disruption in cellular Cu content in *Acinetobacter* [14].  
81 In *Streptococcus pneumoniae*, Zn inhibits the expression of *copY*, which implies that Zn may act  
82 as a non-cognate co-repressor of *copY* [17]. In *Pseudomonas stutzeri*, overlapping regulation of  
83 genes that mediate Cu and Zn resistance has recently been reported [34], suggesting that a core  
84 set of bacterial genes respond to Cu and Zn, and are co-regulated. A Cu-responsive regulatory  
85 system for Cu uptake in *Candida* was recently shown to encompass an Iron (Fe)-starvation stress  
86 response [23]. Collectively, these observations highlight the complexity of bacterial adaptation to  
87 metal excess and limitation, and also point to potential cross-talk mechanisms between metal  
88 management systems that might be used to support cellular homeostasis and effect bacterial  
89 fitness in distinct environments. However, a cross-talk mechanism of Zn-mediated signaling  
90 effects through *copY* as a means of bacterial adaptation to metal stress has not been defined.

91

92 We examined Zn management in GBS, as an opportunistic bacterial pathogen with defined metal  
93 detoxification systems in *copA-copY* and *czcD-sczA*, to determine whether CopY functions as a  
94 cross-system regulator of the bacteria's response to Zn stress. We investigated the transcriptional  
95 links between the systems for Cu and Zn detoxification on a global scale, identified the complete  
96 genome of GBS that contributes to Zn resistance and examined the effects on bacterial virulence.

97

98 **Results**

99 ***Cross-over control of multiple metal efflux pathways by CopY***

100 We recently defined the role of *copY* in regulating responses of GBS to Cu stress via control of  
101 *copA* [20], and *sczA* in regulating Zn stress via *czcD* [21]. Here, to examine cross-control of metal  
102 efflux pathways by non-cognate regulators, we compared the growth and metal stress resistance  
103 phenotypes of GBS mutants deficient in *copY* or *sczA* using defined *in vitro* conditions of either  
104 Cu stress (for *sczA*<sup>-</sup>) or Zn (for *copY*<sup>-</sup>) stress. This cross-comparative approach revealed  
105 unexpected cross-system regulatory effects of CopY towards the resistance of GBS to Zn  
106 intoxication. GBS was rendered severely susceptible to Zn intoxication as a result of *copY*  
107 mutation, according to growth analysis in a chemically-defined minimal medium (CDM) (Fig 1).  
108 *copY* also contributed to GBS resistance to Zn stress in nutritionally-rich growth conditions (THB  
109 medium) but was not significantly effected for growth in the absence of Zn stress (Supplementary  
110 Fig S1A and B). Together, these findings establish that *copY* exerts a key regulatory effect on the  
111 ability of GBS to respond to Zn intoxication.

112

113 Several pathogenic *Streptococcus* spp. respond to environmental stress cues, including excess  
114 metal ions (e.g. Mg<sup>2+</sup>) centrally via global response regulators, including *covRS* [24-26]. In GBS, a  
115 few genes that contribute to Zn homeostasis have also been linked to *covR*-regulation, with *adcR*-  
116 *adcCB* for Zn import in GBS strain 2603V/R, and *czcD* for Zn efflux in both 2603V/r and NEM316  
117 strains [27, 28]. We therefore explored the cross-system effect of Zn and Cu stress at the point of  
118 *covR* by assessing the growth of *covR*<sup>-</sup> GBS in conditions of Zn or Cu stress. This showed a major  
119 contribution of *covR* in supporting GBS resistance to Zn intoxication (Fig 1) reflected in heightened  
120 susceptibility of the *covR* mutant to Zn stress. The mutant was also rendered more susceptible to  
121 Cu intoxication but to a lesser extent (Fig S1B and C). Thus, *covR* supports control of metal

122 resistance in GBS in a manner that parallels the dual-metal resistance function of CopY towards  
123 Zn and Cu.

124

### 125 ***CopY manages multiple intracellular metal pools during Zn stress***

126 We used ICP-OES to measure the total intracellular content of metals in WT and *copY*<sup>-</sup> GBS that  
127 were exposed to Zn stress, which showed that an absence of *copY* led to mis-management of the  
128 intracellular pools of multiple metals, including Zn, Cu, Mn, Fe and Mg (Fig 2). Comparing to WT  
129 in identical conditions, *copY*<sup>-</sup> GBS had elevated levels of Zn, Cu, Mn, Fe and Mg within its cells.  
130 This broad level of mis-management of intracellular metal homeostasis in *copY*<sup>-</sup> GBS is specific to  
131 Zn stress compared to Cu stress [20]. Thus, *copY*-mediated control of metal homeostasis in GBS  
132 extends beyond that of Cu, and enables the bacteria to manage the intracellular pools of multiple  
133 metals. Mutation in *covR* also effected the intracellular pool of some metals, including an elevation  
134 of Mn, and reduction in Fe levels compared to WT (Supplementary Fig S2). Thus, CopY broadly  
135 manages the intracellular pools of multiple metals in GBS exposed to non-cognate metal stress.

136

### 137 ***Transcriptional basis of CopY cross-system control of Zn homeostasis***

138 To discern the effect of *copY* mutation on bacterial transcriptional responses to Zn stress, we  
139 analyzed genes that contribute to Zn resistance in GBS, namely *czcD* and *sczA*, using qPCR to  
140 measure gene expression in *copY*<sup>-</sup> and WT GBS. Additionally, we analyzed Cu-responsive genes  
141 (*copA* and *copY*) in Zn stress, Cu stress and non-exposed controls. Unexpectedly, we detected a  
142 significant cross-system effect whereby *copY* was essential for the induction of *sczA* by Zn (Fig  
143 3A). Interestingly, we also found that *copY* was controlled, in part, by *covR* in the response to Cu  
144 stress, but not Zn stress (Fig 3B); *i.e.*, Cu stress increased the quantity of *copY* mRNA in *covR*<sup>-</sup>  
145 GBS (versus WT in Cu stress). Similarly, activation of *sczA* in response to Zn stress did not occur  
146 in the *covR*<sup>-</sup> strain (Fig 3A). Notably, modulation of i) *sczA* by CopY (or CovR) did not effect *czcD*  
147 expression (Fig 3C), nor did modulation of *copY* by CovR affect *copA* expression (Fig 3D). This  
148 suggests that the sensitivity of *copY*<sup>-</sup> GBS to Zn stress is not be explained by differences in Zn-

149 efflux (*czcD* expression). Finally, *covR* contributes regulatory input as an auxiliary controller, to  
150 govern the expression of the regulatory genes that control Cu and Zn efflux as a master regulator.

151

### 152 ***The copY-driven transcriptome of GBS exposed to Zn stress***

153 We previously used RNA-seq to elucidate the transcriptome of GBS exposed to Zn stress, which  
154 identified >400 differentially expressed genes [21]. Here, we dissected the role of *copY* in the cell  
155 response to Zn stress using RNA-seq to compare *copY*<sup>-</sup> GBS to WT exposed to Zn stress. The  
156 strains were grown in THB or THB supplemented with  $\pm$  0.25 mM Zn (not toxic for either strain) to  
157 facilitate a cross-strain comparison independent of any bias from growth-phase. In comparing  
158 transcriptomes of *copY*<sup>-</sup> GBS to WT in the absence of Zn, in addition to massive de-repression of  
159 *copAZ* (~200-fold up-regulated), we detected notable changes ( $\pm$ 2-fold, P-adj < 0.05) that could  
160 partially explain the sensitivity of the *copY*<sup>-</sup> strain to Zn stress (Fig 4A). For example, we detected  
161 significant upregulation of *adcA* (2.3-fold) in *copY*<sup>-</sup> GBS, encoding a Zn import system in GBS  
162 [29], and a ~4-fold reduction in expression of *arcABCD*, encoding an arginine deaminase system  
163 that confers a survival advantage under Zn stress [21]. Other dysregulated targets included  
164 genes for riboflavin synthesis (*ribDEAH* ~10-fold down, see below) and transport (*ribU* ~2-fold  
165 down), and a surface associated virulence factor (*fbsB* 2.5-fold up) (Dataset S1). In total, we  
166 identified 79 targets that were significantly altered in expression as a result of the loss of *copY* in  
167 GBS (see Dataset S1). Of note was a three-gene locus encoding *cyrR* (here, termed *copY*-  
168 responsive Regulator), *hly3* and *updK*, which was severely down-regulated (9 to 20-fold; (Fig 4A,  
169 Dataset S1); in *E. coli*, CyrR is part of the MerR superfamily that includes Zn- and Cu-responsive  
170 regulators ZntR and CueR; *hly3* encodes a putative hemolysin III/membrane protein but has not  
171 been investigated in GBS.

172

173 Next, we compared the transcriptomes of *copY*<sup>-</sup> GBS and WT exposed to Zn stress, which  
174 revealed 78 transcripts that were significantly altered ( $\pm$ 2-fold, P-adj < 0.05). Strikingly, although  
175 most transcript changes were shared between the strain comparisons independent of Zn stress



176 (e.g. *cyrR-hly3*, *ribDEAH*, *pcl1*, *ykol*), both *adcA* and *arcABCD* no longer responded significantly  
177 to Zn stress in the *copY*<sup>-</sup> strain (Fig 4B & C). Expression data for selected genes and conditions  
178 are shown in Fig 4C (complete set provided in Dataset S1).

179

180 Several genes identified by RNA-seq as being dysregulated were subsequently analyzed using  
181 qRT-PCR to validate the responses of *copY*<sup>-</sup> GBS to Zn stress. We used WT GBS as a baseline to  
182 confirm selected Zn-dependent cross-system transcriptional effects that are controlled by CopY.  
183 This revealed five patterns of gene dysregulation, reflective of CopY cross-system effects, which  
184 are summarized in Fig 5; the patterns were Zn-induced genes that CopY (i) represses (e.g. *garK*-  
185 *gntP*) or (ii) activates (e.g. *ykol*); (iii) Zn-repressed genes that CopY activates (e.g. *pcl1*), (iv)  
186 genes subject to Zn- and CopY-dependent de-repression (e.g. *ribDEAH*); and (v) genes activated  
187 by CopY irrespective of Zn (e.g. *cyrR-hly3-udpK*).

188

189 The *ribDEAH* operon encodes a putative riboflavin synthesis pathway in GBS, and we found these  
190 genes were down-regulated in response to Zn stress in WT GBS in a prior study [21]. The down-  
191 regulation of these genes in response to *copY* mutation in this study hints at a connection between  
192 CopY and Zn stress that might effect bacterial metabolism. To functionally dissect the outcome of  
193 the transcriptional response of *ribDEAH* (considering its activation state was regulated by both Zn  
194 and CopY) we used an isogenic mutant in *ribD* and examined its phenotype in growth assays with  
195 Zn stress. This approach required the synthesis of a Modified Defined Medium (MDM; *Materials*  
196 *and Methods* and Supplementary Table S1) to examine growth in a defined medium deplete of  
197 riboflavin. In MDM lacking riboflavin, *ribD*<sup>-</sup> GBS did not grow and the *copY*<sup>-</sup> strain grew poorly  
198 compared to WT (Fig S1A). In conditions of Zn stress (0.1mM), neither the *ribD*<sup>-</sup> nor the *copY*<sup>-</sup>  
199 strain grew in MDM, however the growth of the WT was unaffected at this Zn concentration (Fig  
200 6A). Supplementation of the media with 0.5 mg/L riboflavin and using the same Zn stress  
201 condition revealed that riboflavin restored growth to *ribD*<sup>-</sup> GBS, however *copY*<sup>-</sup> GBS exhibited a  
202 severe attenuated phenotype in this condition (Fig 6B). Growth of WT GBS was unaffected in the

203 absence of riboflavin, consistent with a functional *ribDEAH* operon and confirming a role for these  
204 genes in *de novo* synthesis of this vitamin; all three strains grew in MDM supplemented with  
205 riboflavin (but without Zn; Fig S3). *ribD* and several other targets subject to CopY regulation (e.g.  
206 *pcl1*, *ykol* and *hvgA*) were likely co-regulated by CovR because their transcription was altered  
207 comparing WT to *covR*<sup>-</sup> GBS (Fig S4). Thus, *copY* plays a central role the GBS Zn stress  
208 response by regulating gene targets at the transcriptional level; genes regulated by *copY* cued by  
209 Zn stress effect GBS growth capacity. Transcriptional co-regulation of Cu and Zn export  
210 responses by *covR* provides auxiliary control beyond *copY* to manage metal stress in GBS.

211

212 To analyze an additional *copY*-regulated target cued by Zn stress in GBS and test the functional  
213 outcome of bacterial growth, we mutated *hly3* and analysed the growth of the *hly3*<sup>-</sup> strain with and  
214 without Zn stress in both nutritive and nutrient-limited medium. We found the isogenic *hly3*<sup>-</sup> strain  
215 was significantly impaired for growth in THB (Fig. S5A) but this attenuation was absent from  
216 comparisons of WT to *hly3*<sup>-</sup> mutant in Zn stress conditions in THB (Fig S5B) or in CDM (Fig S5C  
217 and D). These data suggest that *hly3* contributes to growth activities that occur in THB, but not  
218 CDM, that are disrupted during Zn stress. These findings establish that *hly3* is a target of *copY* in  
219 response to Zn stress, and it likely contributes to growth of GBS in certain conditions. Together,  
220 these findings demonstrate that GBS engages CopY in response to multiple metal stress cues to  
221 enable a coordinated gene expression response that extends beyond the *cop* operon to support  
222 bacterial survival during metal stress.

223

#### 224 ***CopY is conserved among streptococci and supports virulence***

225 The function of *copY* that confers a transcriptional mechanism of cross-system control to respond  
226 to Zn stress in GBS prompted us to examine conservation among other pathogenic streptococci,  
227 and ascertain whether it contributes to pathogenesis. Sequence analysis and structural modelling  
228 revealed that *copY* is highly conserved among multiple GBS strains, as well as other pathogenic  
229 *Streptococcus* spp., and other pathogenic gram-positive cocci (Fig 7). This modelling enabled a

230 schematic representation of the putative metal binding site at the C-terminus of the *S. agalactiae*  
231 CopY (Fig 7). In the absence of any ascribed role for *copY* in the pathogenicity of any bacterium,  
232 we tested whether *copY* contributes to GBS virulence using a model of systemic disseminated  
233 infection. Remarkably, *in vivo* infection assays in mice showed that *copY* was critical to GBS  
234 virulence; we observed that *copy*<sup>-</sup> GBS was severely attenuated in the blood, heart, lungs, spleen  
235 and kidneys of mice at 24h post-infection (Fig 8). Expectedly, *covR*<sup>-</sup> GBS was also attenuated in  
236 the blood, heart and lungs but was recovered in higher numbers from brain and liver compared to  
237 WT (Fig 8), pointing to tissue-specific effects. Thus, *copY* functions to support bacterial virulence.

238

### 239 **Forward genetic screen for mediators of GBS resistance to Zn stress**

240 To examine the entire GBS genome for functionally related regions that contribute to resistance  
241 to Zn stress we used an open-ended approach based on a super-saturated ~430,000-mutant  
242 library, generated using pGh9-ISS1 [30]. We exposed the bacteria to Zn stress, comparing to  
243 non-exposed controls *en masse*. Stringent selection criteria ( $\pm 4$ -fold, P-adj < 0.05) identified 12  
244 genes that were essential for GBS to survive during Zn stress; insertional site mapping revealed  
245 the frequency of insertions was significantly under-represented in these 12 genes (Fig 9A and  
246 Dataset S2). Conversely, 26 genes for which the mapped insertions were over-represented were  
247 identified, suggesting that constrain GBS growth in Zn stress. Representative mapping is shown  
248 for selected genes in Fig 9B-D. To validate these hits, we generated targeted isogenic mutants of  
249 several candidate genes of the Zn stress resistome, including *stp1* and *stk1* (CHF17\_00435 and  
250 CHF00436; serine/threonine phosphatase and kinase pair), *celB* (CHF17\_01596; EIIC  
251 disaccharide transporter), *rfaB* (CHF17\_00838; glycosyltransferase), and *yceG* (CHF17\_01646;  
252 *mltG*-like endolytic transglycosylase). In comparing the growth of WT GBS to mutants in Zn, we  
253 detected attenuation in all mutants (for under-represented genes) (Fig 10A-B). Notably, some  
254 strains exhibited growth defects in the absence of Zn (e.g.  $\Delta stp1$ ,  $\Delta stk1$  and  $\Delta plyB$ ). Mutation of  
255 *arcR* (over-represented) showed a hyper-resistance phenotype; the  $\Delta arcR$  mutant grew in high  
256 Zn (CDM with 0.25 mM; Fig 9C), which approached inhibitory for the WT (Fig 10A). Together,

257 these findings identify a suite of genes in the GBS genome that contribute to the bacteria's ability  
258 to resist Zn intoxication, and which function either by supporting or constraining growth of GBS.  
259

## 260 **Discussion**

261 One important function of metalloregulatory proteins is to bind and respond to cognate effectors,  
262 while ignoring non-cognate (competing) metals. In bacteria, this functional feature facilitates co-  
263 ordinated expression of metal acquisition systems in conditions of metal limitation, whereas, during  
264 metal excess, it enables bacteria to drive efflux systems to underpin divergent, contrary responses  
265 and resist metal intoxication [3]. The dogma of the function of the CopY transcriptional regulator in  
266 bacteria has until now centred on the management of Cu homeostasis via direct effects on the *cop*  
267 operon, in response to cues from its cognate effector, Cu. Despite the essential role of CopY in  
268 Cu homeostasis in bacteria, a hypothesis that CopY is nonresponsive to competing metals has  
269 not directly been addressed until now. This study establishes a new, biologically consequential  
270 function of CopY is the mediation of cellular responses to Zn stress in bacteria, which for GBS  
271 entails (i) a fundamental role of *copY* in conferring bacterial resistance to Zn intoxication, (ii) robust  
272 regulatory inputs from *copY* in response to Zn stress cues, which drive cross-system effects to  
273 support bacterial Zn homeostasis, (iii) a virulence function of *copY* that promotes GBS survival in  
274 acute disseminated infection, and (v) a defined 46-member family of targets in GBS that comprise  
275 the Zn resistome. Overall, this study shows that *copY* controls two discrete systems for Cu and Zn  
276 homeostasis in *Streptococcus*, and establishes a collection of genomic elements that enable the  
277 bacteria to survive Zn intoxication.

278

279 The transcriptional landscape of GBS in response to Zn defined here elucidates a CopY-regulon  
280 of Zn-responsive targets, which represents the first described in a bacterial pathogen. In defining  
281 the cross-system effects of CopY that stem from exposure to Zn stress, this study reveals that  
282 *copY* induces robust expression of all the genes that make up the *cop* operon. *copY* regulates a  
283 small but distinctive group of additional targets, including multiple genes that have no known links

284 with metal stress responses in bacteria nor virulence (e.g., *hly3*, *cyrR*, *ribD*, *ykoI*, *garK*). One of  
285 these, CyrR, is of the MerR superfamily that includes Zn- and Cu-responsive regulators ZntR and  
286 CueR of *E. coli* [1, 31]. Identification of a three-gene locus of *cyrR*, *hly3* and *updK*, which GBS  
287 down-regulates in response to Zn stress supports the hypothesis that this locus responds to  
288 various regulatory inputs, as reported previously [32, 33]. Intriguingly, in our study, this response  
289 required intact *copY*, revealing a novel mechanism of transcriptional control of the *cyrR-hly3-*  
290 *updK* locus. Another locus of the CopY-regulon of Zn-responsive targets, *ribDEAH*, supports  
291 riboflavin biosynthesis; *ribD* has no prior known links with Zn or Cu resistance in bacteria. Testing  
292 of a targeted mutant for *ribD* revealed a contribution of riboflavin synthesis to resisting Zn stress.  
293 Riboflavin supports an array of metabolic processes because it's downstream products are flavin  
294 coenzymes, flavin mononucleotide (FMN) and flavin adenine dinucleotide (FAD), as required for  
295 oxidative metabolism and other processes; in addition, FMN can act as a precursor to cobalamin  
296 synthesis [34]. GBS contains a putative homologue of a riboflavin import protein RibU  
297 (ASZ01710.1) which is down-regulated ~2-fold in the *copY* background (Dataset S1). In *S.*  
298 *pyogenes*, well studied for Zn intoxication resistance [11, 15, 35], the *ribDEAH* genes are absent,  
299 such that the organism relies solely on riboflavin import [36]. In *S. pneumoniae*, differential  
300 expression of *ribDEAH* leads to differences in host responses to different clinical isolates [37].  
301 Precisely how riboflavin synthesis, versus uptake, (in bacteria such as GBS that can do both)  
302 contributes to attenuation of growth during Zn stress will need to be examined in future work.  
303  
304 In analyzing the function of *copY* compared to the Zn responsive regulator *sczA*, this study reveals  
305 the opposing nature of these two metalloregulatory proteins. The former responds to non-cognate  
306 Zn cues, but the latter is essentially non-responsive to Cu. We demonstrate that GBS in Zn stress  
307 utilizes CopY to regulate the intracellular pools of multiple metals in addition to Cu. This supports  
308 a model in which the ability of CopY to mediate cross-system effects is specific and functionally  
309 distinct from another key metalloregulatory protein. Structural modelling shows a high degree of  
310 conservation of CopY among pathogens closely related to GBS, which implies that cross-system

311 effects for management of responses to metal stress at the point of *copY* may operate in other  
312 bacteria. These conserved aspects of CopY among related bacteria suggest that there will be  
313 utility in testing the function of *copY* in response to non-cognate metal stress in other bacteria.

314

315 The TraDIS in this study provides a comprehensive analysis of the Zn stress resistome of GBS,  
316 and identifies multiple targets new to the bacterial metal detoxification field [38]. Several identified  
317 as being most strongly associated with GBS survival in Zn stress (e.g. *arcR*, *rfaB*, *plyB*, *yceG*,  
318 *celB*, *stp1*) have not previously been linked to metal stress responses in any bacteria. TraDIS  
319 was used recently to study GBS survival in blood revealed effects of calprotectin [39-41]. The  
320 suite of genes encoding regulators and putative effectors that confer GBS resistance to Zn stress  
321 identified in this study dramatically expands our understanding of metal management in bacteria  
322 by offering new insight into the diversity of genes that mediate resistance to Zn intoxication, such  
323 as those encoding enzymes for metabolism and cell wall synthesis, transporters, and global  
324 transcriptional regulators. Our approach identified *arcR* and *argR*, two adjacent regulators that  
325 likely co-ordinate arginine deaminase (encoded by *arcABC*) expression, as constraining Zn  
326 resistance in GBS, since *ISS1* insertions were significantly enriched in *arcR* and *argR*. Isogenic  
327 mutation in *arcR* enhanced resistance to Zn, consistent with the TraDIS finding. A previous study  
328 identified a role for *arcA* in conferring resistance to Zn stress, since an isogenic *arcA* mutation  
329 attenuated growth under Zn intoxication conditions [21]. Interestingly, in contrast to this  
330 observation, we detected enrichment, rather than reduction, in *ISS1* insertions in *arcA*. This could  
331 be explained by a potential for polar effects of *ISS1* insertion on the *arcABDC* locus. It would be  
332 of interest to examine the contribution of *arcBC* and *arcD* to Zn resistance, since these encode  
333 proteins that produce or import ornithine, which was recently shown to rescue Zn sensitivity in  
334 GBS [21].

335

336 Analysis of CovR/CovS in the GBS response to Zn stress revealed a role for the Stk1/Stp1-CovR  
337 regulation axis in mediating Zn resistance. Stp1/Stk1 phosphorylate CovR to drive its effects [42,

338 43] and we found *stp1/stk1* were essential for Zn resistance. Together, these findings show that  
339 Stk1/Stp1-CovR regulatory activity helps to support Zn resistance in GBS. The CovR/CovS two-  
340 component system has been linked to streptococcal virulence but has not previously been linked  
341 with a response to Zn stress. That *covR* promotes resistance to Zn intoxication in GBS can be  
342 used to suggest a parallel between the *covRS* system and the dual-metal resistance regulatory  
343 function of *copY*, whereby the regulator governs resistance of the bacteria to multiple metals. A  
344 two-component system in *Caulobacter crescentus*, UzcRS, is highly responsive to both Zn and  
345 Cu (and uranium) to couple a response regulator to different extracytoplasmic metal stress  
346 responses [44]. In *Pseudomonas stutzeri*, overlapping regulation for Cu and Zn resistance genes  
347 was recently reported [45], with cross-regulation achieved by a core set of *P. stutzeri* Cu and Zn-  
348 responsive genes. In *Mycobacterium tuberculosis*, two paralogous ATPases, CtpD and CtpJ that  
349 are activated by Co(2+) and Ni(2+) appear to mediate metal efflux, but play non-redundant roles  
350 in virulence and metal efflux [46]. Further elucidation of cross-talk mediated by CopY, and CovR  
351 as a regulator governing resistance of GBS to multiple metals will be help to more clearly define  
352 their functions in comparison to systems in other bacterial pathogens.

353

354 Bacterial resistance to metal stress is used by some pathogens to evade host defences [12, 47].  
355 Cu management contributes to virulence in some infections, but a role for CopY in virulence has  
356 not been reported. For example, *S. pneumoniae* regulates central metabolism in response to  
357 metal stress to support bacterial survival [41], and uses CopA to drive virulence during host  
358 infection [17]. In *E. coli*, Cu-transporting ATPases, including CopA are required for bacteria  
359 survival in an *in vitro* host-pathogen interface in macrophages [48]. We found that *copY*  
360 contributes to the virulence of GBS because *copY* GBS was attenuated in multiple organs,  
361 including the blood, heart, lungs, and kidneys of mice following systemic infection. These findings  
362 are consistent with prior observations that have alluded to a role of CopY in supporting bacterial  
363 virulence. For example, increased expression of *copY* in *S. pneumoniae* in the lungs of mice was  
364 reported [17], and higher Cu levels along with co-incident up-regulation of *copYAZ* in the blood

365 of mice infected with *S. pyogenes* was reported [16]. Our findings for the *covR* mutant show that  
366 this global virulence regulator supports *S. agalactiae* survival but this depends on tissue context;  
367 the role of CovR in brain infection is consistent with a prior report [43].

368

369 The finding of massive upregulation (200-fold) of *copA-copZ* in *copY*<sup>-</sup> GBS is notable because  
370 this is based on a non-polar, unmarked deletion that we generated in this study. It would be of  
371 interest to determine if such transcription is translated into an enhancement of CopA-CopZ  
372 proteins of this magnitude. If so, this would place a significant metabolic burden on RNA and  
373 protein synthesis machinery and presumably might attenuate GBS growth. Differential insertion of  
374 *ISS1* was not detected in *copY* under Zn stress in the TraDIS analysis. This could be accounted  
375 for by the potential for polar effects of *ISS1* insertion in *cis*, thus abolishing, rather than up-  
376 regulating, *copA-copZ* transcription. Pointedly though, although growth rate of the *copY*<sup>-</sup> strain  
377 was reduced in THB medium conditioned for Zn stress (Fig 1B), this strain was able to achieve  
378 significant culture densities after 12h of growth. In support of this, several of the novel Zn  
379 resistome targets (e.g. *rfaB*, *stp1*, *celB*) exhibited a more dramatic attenuation phenotype  
380 compared to the *copY*<sup>-</sup> strain (Fig S6). Future studies might utilise a nutrient-limited medium such  
381 as CDM or MDM with TraDIS and Zn stress to yield new factors that support GBS Zn resistance.

382

383 In summary this study identifies a new role of *copY* in responding to Zn stress in GBS, revealing  
384 novel regulatory cross-talk between this Cu-sensing repressor that results in modulation of Zn  
385 homeostasis. The Zn sensitivity phenotype of *copY*-deficient GBS is not attributed to a single Zn-  
386 resistance effector (such as the CzcD efflux system) but arises from pleiotropic effects that  
387 encompass multiple factors that underpin GBS survival during Zn stress. These include arginine  
388 deaminase expression (via *arcABDC*), Zn import (via *adcA*) riboflavin synthesis (via *ribDEAH*)  
389 and an as-yet undefined role for the *cyrR-hly3* locus.

390



391 **Materials and Methods**

392 **Bacterial strains, plasmids and growth conditions**

393 GBS, *E. coli* and plasmids used are listed in Supplementary Table S2. GBS was routinely grown  
394 in Todd-Hewitt Broth (THB) or on TH agar (1.5% w/v). *E. coli* was grown in Lysogeny Broth (LB)  
395 or on LB agar. Routine retrospective colony counts were performed by plating dilutions of bacteria  
396 on tryptone soya agar containing 5% defibrinated horse blood (Thermo Fisher Scientific). Media  
397 were supplemented with antibiotics (spectinomycin (Sp) 100µg/mL; chloramphenicol (Cm) 10  
398 µg/mL), as indicated. Growth assays used 200µL culture volumes in 96-well plates (Greiner)  
399 sealed using Breathe-Easy® membranes (Sigma-Aldrich) and measured attenuation (*D*, at  
400 600nm) using a ClarioSTAR multimode plate reader (BMG Labtech) in Well Scan mode using a  
401 3mm 5x5 scan matrix with 5 flashes per scan point and path length correction of 5.88mm, with  
402 agitation at 300rpm and recordings taken every 30min. Media for growth assays were THB and a  
403 modified Chemically-Defined Medium (CDM) [29] (with 1g/L glucose, 0.11g/L pyruvate and  
404 50mg/L L-cysteine), or Modified Defined Medium (MDM; see Supplementary Table S1)  
405 supplemented with Cu or Zn (supplied as CuSO<sub>4</sub> or ZnSO<sub>4</sub>) as indicated. For attenuation baseline  
406 correction, control wells without bacteria were included for Cu or Zn in media alone.

407 **DNA extraction and genetic modification of GBS**

408 Plasmid DNA was isolated using miniprep kits (QIAGEN), with modifications for GBS as  
409 described elsewhere [49]. Mutant strains (Supplementary Table S2) were generated by isogenic  
410 gene-deletions, constructed by markerless allelic exchange using pHY304aad9 as described  
411 previously [21, 50]. Plasmids and primers are listed in Supplementary Table S2 and  
412 Supplementary Table S3, respectively. Mutants were validated by PCR using primers external to  
413 the mutation site and DNA sequencing.

414 **RNA extraction, qRT-PCR**

415 For Cu and Zn exposure experiments, 1mL of overnight THB cultures were back-diluted 1/100 in  
416 100mL of THB (prewarmed at 37°C in 250mL Erlenmeyer flasks) supplemented with 0.25 mM Zn  
417 or 0.5 mM Cu. Cultures were grown shaking (200rpm) at 37°C; after exactly 2.5h, 10-50mL

418 volumes containing approximately 500 million mid-log bacteria were harvested; RNA was  
419 preserved and isolated as described previously [51]. RNA quality was analysed by RNA LabChip  
420 using GX Touch (Perkin Elmer). RNA (1000ng) was reverse-transcribed using Superscript IV  
421 according to manufacturer's instructions (Life Technologies) and cDNA was diluted 1:50 in water  
422 prior to qPCR. Primers (Supplementary Table S3) were designed using Primer3 Plus [52, 53] to  
423 quantify transcripts using Universal SYBR Green Supermix (Bio-Rad) using a Quantstudio 6 Flex  
424 (Applied Biosystems) system in accordance with MIQE guidelines [54]. Standard curves were  
425 generated using five-point serial dilutions of genomic DNA (5-fold) from WT GBS 874391 [55].  
426 Expression ratios were calculated using  $C_T$  values and primer efficiencies as described elsewhere  
427 [56] using *dnaN*, encoding DNA polymerase III  $\beta$ -subunit as housekeeper.

#### 428 **Whole bacterial cell metal content determination**

429 Metal content in cells was determined as described [10]. Cultures were prepared essentially as  
430 described for *RNA extraction, qRT-PCR* with the following modifications; THB medium was  
431 supplemented with 0.25 mM Zn or 0.5 mM Cu or not supplemented (Ctrl), and following exposure  
432 for 2.5h, bacteria were harvested by centrifugation at 4122 x g at 4°C. Cell pellets were washed 3  
433 times in PBS + 5mM EDTA to remove extracellular metals, followed by 3 washes in PBS.  
434 Pelleted cells were dried overnight at 80°C and resuspended in 1mL of 32.5% nitric acid and  
435 incubated at 95°C for 1h. The metal ion containing supernatant was collected by centrifugation  
436 (14,000 x g, 30min) and diluted to a final concentration of 3.25% nitric acid for metal content  
437 determination using inductively coupled plasma optical emission spectroscopy (ICP-OES). ICP-  
438 OES was carried out on an Agilent 720 ICP-OES with axial torch, OneNeb concentric nebulizer  
439 and Agilent single pass glass cyclone spray chamber. The power was 1.4kW with 0.75L/min  
440 nebulizer gas, 15L/min plasma gas and 1.5L/min auxiliary gas flow. Cu was analysed at  
441 324.75nm, Zn at 213.85nm, Fe at 259.94nm and Mn at 257.61nm with detection limits at

442 <1.1ppm. The final quantity of each metal was normalised using dry weight biomass of the cell  
443 pellet prior to nitric acid digestion, expressed as  $\mu\text{g}\cdot\text{g}^{-1}$  dry weight.

#### 444 **RNA sequencing and bioinformatics**

445 Cultures were prepared as described above for *RNA extraction*, *qRTPCR* to compare mid-log  
446 phase WT or  $\Delta\text{copY}$  cells grown in THB + 0.25 mM Zn or in THB without added Zn. RNase-free  
447 DNase-treated RNA that passed Bioanalyzer 2100 (Agilent) analysis was used for RNA  
448 sequencing (RNA-seq) using the Illumina NextSeq 500 platform. We used a Bacterial Ribosomal  
449 RNA (rRNA) Depletion kit (Invitrogen) prior to library construction, and TruSeq library generation  
450 kits (Illumina, San Diego, California). Library construction consisted of random fragmentation of  
451 the RNA, and cDNA production using random primers. The ends of the cDNA were repaired and  
452 A-tailed, and adaptors were ligated for indexing (with up to 12 different barcodes per lane) during  
453 the sequencing runs. The cDNA libraries were quantitated using qPCR in a Roche LightCycler  
454 480 with the Kapa Biosystems kit (Kapa Biosystems, Woburn, Massachusetts) prior to cluster  
455 generation. Clusters were generated to yield approximately 725K–825K clusters/mm<sup>2</sup>. Cluster  
456 density and quality was determined during the run after the first base addition parameters were  
457 assessed. We ran single-end 75–bp sequencing runs to align the cDNA sequences to the  
458 reference genome. For data preprocessing and bioinformatics, STAR (version 2.7.3a) was used  
459 (parameters used: --outReadsUnmapped Fastx --outSAMtype BAM SortedByCoordinate --  
460 outSAMattributes All) to align the raw RNA sequencing fastq reads to the WT *S. agalactiae*  
461 874391 reference genome [55]. HTSeq-count, version 0.11.1 (parameters used: -r pos -t exon -i  
462 gene\_id -a 10 -s no -f bam), was used to estimate transcript abundances [57]. DESeq2 was then  
463 used to normalized and test for differential expression and regulation following their vignette.  
464 Genes that met certain criteria (i.e. fold change of  $> \pm 2.0$ , q value (false discovery rate, FDR of  
465  $< 0.05$ ) were accepted as significantly altered [58]. Raw and processed data were deposited in

466 Gene Expression Omnibus (accession no. GSE167895 for *S. agalactiae* 874391 Cu condition;  
467 GSE167894 (*S. agalactiae* 874391 control condition)).

#### 468 **Animals and Ethics statement**

469 Virulence was tested using a mouse model of disseminated infection based on intravenous  
470 challenge with  $10^7$  GBS (WT,  $\Delta copY$  or  $\Delta covR$ ) as described elsewhere [59]. This study was  
471 carried out in accordance with the guidelines of the Australian National Health and Medical  
472 Research Council. The Griffith University Animal Ethics Committee reviewed and approved all  
473 experimental protocols for animal usage according to the guidelines of the National Health and  
474 Medical Research Council (approval: MSC/01/18/AEC).

#### 475 **Transposon Directed Insertion Site Sequencing (TraDIS)**

476 Generation and screening of the 874391:ISS1 library was performed essentially as previously  
477 described [60], with some modifications. Briefly, the pGh9:ISS1 plasmid (provided by A.  
478 Charbonneau *et al.*) was transformed into WT *S. agalactiae*, and successful transformants were  
479 selected by growth on THB agar supplemented with 0.5 $\mu$ g/mL Erythromycin (Em). A single  
480 colony was picked and grown in 10mL of THB with 0.5 $\mu$ g/mL Em at 28°C overnight. The  
481 overnight cultures were incubated at 40°C for 3h to facilitate random transposition of ISS1 into  
482 the bacterial chromosome. Transposon mutants were selected by plating cultures onto THB agar  
483 supplemented with Em and growing overnight at 37°C. Pools of the transposon mutants were  
484 harvested with a sterile spreader and stored in THB supplemented with 25% glycerol at -80°C.  
485 The final library of approximately 470,000 mutants was generated by pooling two independent  
486 batches of mutants.

487 Exposure of the library used approximately  $1.9 \times 10^8$  bacteria inoculated into 100mL of THB (non-  
488 exposed Ctrl) or THB supplemented with 1mM Zn in THB. The cultures were grown for 12h at  
489 37°C (shaking), and subsequently, 10mL of culture were removed and washed once with PBS.  
490 Genomic DNA was extracted from three cell pellets per condition (prepared as independent  
491 biological samples) using the DNeasy UltraClean Microbial Kit (Qiagen) according the  
492 manufacturer's instructions, except that the cell pellets were incubated with 100 units of

493 mutanolysin and 40mg of RNase A at 37°C for 90min.

494 Genomic DNA was subjected to library preparation as previously described [60], with slight  
495 modifications. Briefly, the NEBNext dsDNA fragmentase (New England BioLabs) was used to  
496 generate DNA fragments in the range of 200-800bp. An in-house Y-adaptor was generated by  
497 mixing and incubating adaptor primers 1 and 2 (100µM, Supplementary Table S3) for 2min at  
498 95°C, and chilling the reaction to 20°C by incremental decreases in temperature by 0.1°C. The  
499 reaction was placed on ice for 5min, and ice cold ultra-pure water was added to dilute the  
500 reaction to 15µM. The Y-adaptor was ligated to the ends of the fragments using the NEBNext  
501 Ultra II DNA Library Prep Kit for Illumina (New England BioLabs) according to the manufacturer's  
502 instructions. All adaptor ligated fragments were incubated with *NotI*.HF (New England BioLabs)  
503 for 2h at 37°C to deplete plasmid fragments. The digested fragments were PCR amplified as per  
504 the protocol outlined in the NEBNext Ultra II DNA Library Prep Kit using a specific ISS1 primer  
505 and reverse indexing primer (Dataset S4). DNA quantification was undertaken using a QuBit  
506 dsDNA HS Assay Kit (Invitrogen) and purified using AMPure XP magnetic beads (Beckman  
507 Coulter). All libraries were pooled and submitted for sequencing on the MiSeq platform at the  
508 Australian Centre for Ecogenomics (University of Queensland, Australia).

509 The sequencing data generated from TraDIS libraries were analysed used the Bio-TraDIS scripts  
510 [61] on raw demultiplexed sequencing reads. Reads containing the transposon tag  
511 (CAGAAACTTTGCAACAGAACC) were filtered and mapped to the genome of WT *S. agalactiae*  
512 874391 using the bacteria\_tradis script with the "--smalt\_y 1" and "--smalt\_r 0" parameters to  
513 ensure accuracy of insertion mapping. Subsequent analysis steps to determine log<sub>2</sub> fold-change  
514 (log<sub>2</sub>FC), false discovery rate (FDR) and P value were carried out with the AlbaTraDIS script [62].  
515 To identify genes in *S. agalactiae* 874391 required for resistance to Zn intoxication condition  
516 used, we used a stringent criteria of log<sub>2</sub>FC ≤ -2 or ≥ 2, FDR <0.001 and P value <0.05. The  
517 TraDIS reads are deposited in the Sequence Read Archive (SRA) under BioProject ID:  
518 PRJNA674399.

## 519 **Statistical methods**

520 All statistical analyses used GraphPad Prism V8 and are defined in respective Figure Legends.

521 Statistical significance was accepted at P values of  $\leq 0.05$ .

522

523 **Acknowledgments**

524 We gratefully acknowledge Andrew Waller and Amy Charbonneau, Animal Health Trust (Suffolk,  
525 UK) for providing pGh9-ISS1. We thank Michael Crowley and David Crossman of the Heflin  
526 Center for Genomic Science Core Laboratories, University of Alabama at Birmingham  
527 (Birmingham, AL) for RNA sequencing. We also thank Lahiru Katupitiya and Dean Gosling for  
528 excellent technical assistance. This work was supported by a Project Grant from the National  
529 Health and Medical Research Council (NHMRC) Australia (APP1146820 to GCU). The funders  
530 had no role in study design, data collection and analysis, decision to publish, or preparation of the  
531 manuscript. The authors have declared that no competing interests exist.  
532

533 **References**

- 534 1. Watly J, Potocki S, Rowinska-Zyrek M. Zinc Homeostasis at the Bacteria/Host Interface-  
535 From Coordination Chemistry to Nutritional Immunity. *Chemistry*. 2016;22(45):15992-6010. Epub  
536 2016/10/22. doi: 10.1002/chem.201602376. PubMed PMID: 27555527.
- 537 2. Osman D, Cavet JS. Copper homeostasis in bacteria. *Adv Appl Microbiol*. 2008;65:217-  
538 47. Epub 2008/11/26. doi: 10.1016/S0065-2164(08)00608-4. PubMed PMID: 19026867.
- 539 3. Chandrangsu P, Rensing C, Helmann JD. Metal homeostasis and resistance in bacteria.  
540 *Nature Reviews Microbiology*. 2017;15(6):338-50. Epub 2017/03/28. doi:  
541 10.1038/nrmicro.2017.15. PubMed PMID: 28344348; PubMed Central PMCID: PMC5963929.
- 542 4. German N, Doyscher D, Rensing C. Bacterial killing in macrophages and amoeba: do they  
543 all use a brass dagger? *Future Microbiol*. 2013;8(10):1257-64. Epub 2013/09/26. doi:  
544 10.2217/fmb.13.100. PubMed PMID: 24059917.
- 545 5. Djoko KY, Ong CL, Walker MJ, McEwan AG. The Role of Copper and Zinc Toxicity in  
546 Innate Immune Defense against Bacterial Pathogens. *J Biol Chem*. 2015;290(31):18954-61. Epub  
547 2015/06/10. doi: 10.1074/jbc.R115.647099. PubMed PMID: 26055706; PubMed Central PMCID:  
548 PMC4521016.
- 549 6. Ladomersky E, Petris MJ. Copper tolerance and virulence in bacteria. *Metallomics*.  
550 2015;7(6):957-64. Epub 2015/02/06. doi: 10.1039/c4mt00327f. PubMed PMID: 25652326; PubMed  
551 Central PMCID: PMC4464932.
- 552 7. Besold AN, Culbertson EM, Culotta VC. The Yin and Yang of copper during infection.  
553 *Journal of Biological and Inorganic Chemistry*. 2016;21(2):137-44. Epub 2016/01/23. doi:  
554 10.1007/s00775-016-1335-1. PubMed PMID: 26790881; PubMed Central PMCID:  
555 PMC5535265.
- 556 8. Djoko KY, Goytia MM, Donnelly PS, Schembri MA, Shafer WM, McEwan AG. Copper(II)-  
557 Bis(Thiosemicarbazonato) Complexes as Antibacterial Agents: Insights into Their Mode of Action  
558 and Potential as Therapeutics. *Antimicrob Agents Chemother*. 2015;59(10):6444-53. Epub



- 559 2015/08/05. doi: 10.1128/AAC.01289-15. PubMed PMID: 26239980; PubMed Central PMCID:  
560 PMCPMC4576059.
- 561 9. McDevitt CA, Ogunniyi AD, Valkov E, Lawrence MC, Kobe B, McEwan AG, et al. A  
562 molecular mechanism for bacterial susceptibility to zinc. *PLoS Pathog.* 2011;7(11):e1002357. Epub  
563 2011/11/11. doi: 10.1371/journal.ppat.1002357. PubMed PMID: 22072971; PubMed Central  
564 PMCID: PMCPMC3207923.
- 565 10. Eijkelkamp BA, Morey JR, Ween MP, Ong CL, McEwan AG, Paton JC, et al. Extracellular  
566 zinc competitively inhibits manganese uptake and compromises oxidative stress management in  
567 *Streptococcus pneumoniae*. *PLoS ONE.* 2014;9(2):e89427. Epub 2014/02/22. doi:  
568 10.1371/journal.pone.0089427. PubMed PMID: 24558498; PubMed Central PMCID:  
569 PMCPMC3928430.
- 570 11. Ong CL, Walker MJ, McEwan AG. Zinc disrupts central carbon metabolism and capsule  
571 biosynthesis in *Streptococcus pyogenes*. *Scientific Reports.* 2015;5:10799. Epub 2015/06/02. doi:  
572 10.1038/srep10799. PubMed PMID: 26028191; PubMed Central PMCID: PMCPMC4450579.
- 573 12. Kapetanovic R, Bokil NJ, Achard ME, Ong CL, Peters KM, Stocks CJ, et al. *Salmonella*  
574 employs multiple mechanisms to subvert the TLR-inducible zinc-mediated antimicrobial response  
575 of human macrophages. *FASEB J.* 2016;30(5):1901-12. Epub 2016/02/04. doi:  
576 10.1096/fj.201500061. PubMed PMID: 26839376.
- 577 13. Achard Maud ES, Stafford Sian L, Bokil Nilesh J, Chartres J, Bernhardt Paul V, Schembri  
578 Mark A, et al. Copper redistribution in murine macrophages in response to *Salmonella* infection.  
579 *Biochem J.* 2012;444(1):51-7.
- 580 14. Hassan KA, Pederick VG, Elbourne LD, Paulsen IT, Paton JC, McDevitt CA, et al. Zinc  
581 stress induces copper depletion in *Acinetobacter baumannii*. *BMC Microbiol.* 2017;17(1):59. Epub  
582 2017/03/13. doi: 10.1186/s12866-017-0965-y. PubMed PMID: 28284195; PubMed Central PMCID:  
583 PMCPMC5346208.

- 584 15. Ong CL, Gillen CM, Barnett TC, Walker MJ, McEwan AG. An antimicrobial role for zinc in  
585 innate immune defense against group A streptococcus. *J Infect Dis.* 2014;209(10):1500-8. doi:  
586 10.1093/infdis/jiu053. PubMed PMID: 24449444.
- 587 16. Stewart LJ, Ong CY, Zhang MM, Brouwer S, McIntyre L, Davies MR, et al. Role of  
588 Glutathione in Buffering Excess Intracellular Copper in *Streptococcus pyogenes*. *mBio.* 2020;11(6).  
589 Epub 2020/12/03. doi: 10.1128/mBio.02804-20. PubMed PMID: 33262259.
- 590 17. Shafeeq S, Yesilkaya H, Kloosterman TG, Narayanan G, Wandel M, Andrew PW, et al.  
591 The *cop* operon is required for copper homeostasis and contributes to virulence in *Streptococcus*  
592 *pneumoniae*. *Mol Microbiol.* 2011;81(5):1255-70. Epub 2011/07/09. doi: 10.1111/j.1365-  
593 2958.2011.07758.x. PubMed PMID: 21736642.
- 594 18. O'Brien H, Alvin JW, Menghani SV, Sanchez-Rosario Y, Van Doorslaer K, Johnson MDL.  
595 Rules of Expansion: an Updated Consensus Operator Site for the CopR-CopY Family of Bacterial  
596 Copper Exporter System Repressors. *mSphere.* 2020;5(3). Epub 2020/05/29. doi:  
597 10.1128/mSphere.00411-20. PubMed PMID: 32461276; PubMed Central PMCID:  
598 PMC7253601.
- 599 19. Kloosterman TG, van der Kooi-Pol MM, Bijlsma JJ, Kuipers OP. The novel transcriptional  
600 regulator SczA mediates protection against Zn<sup>2+</sup> stress by activation of the Zn<sup>2+</sup>-resistance gene  
601 *czcD* in *Streptococcus pneumoniae*. *Mol Microbiol.* 2007;65(4):1049-63. Epub 2007/07/21. doi:  
602 10.1111/j.1365-2958.2007.05849.x. PubMed PMID: 17640279.
- 603 20. Sullivan MJ, Goh KG, Gosling D, Katupitiya L, Ulett GC. Copper intoxication in group B  
604 *Streptococcus* triggers transcriptional activation of the *cop* operon that contributes to enhanced  
605 virulence during acute infection. *J Bacteriol.* 2021;in press.
- 606 21. Sullivan MJ, Goh KG, Ulett GC. Cellular Management of Zinc in Group B *Streptococcus*  
607 Supports Bacterial Resistance against Metal Intoxication and Promotes Disseminated Infection.  
608 *mSphere.* 2021;6(3). Epub 2021/05/21. doi: 10.1128/mSphere.00105-21. PubMed PMID:  
609 34011683.

- 610 22. Cobine PA, Jones CE, Dameron CT. Role for zinc(II) in the copper(I) regulated protein  
611 CopY. *J Inorg Biochem.* 2002;88(2):192-6. Epub 2002/01/23. doi: 10.1016/s0162-0134(01)00378-  
612 6. PubMed PMID: 11803039.
- 613 23. Culbertson EM, Bruno VM, Cormack BP, Culotta VC. Expanded role of the Cu-sensing  
614 transcription factor Mac1p in *Candida albicans*. *Mol Microbiol.* 2020;114(6):1006-18. Epub  
615 2020/08/19. doi: 10.1111/mmi.14591. PubMed PMID: 32808698.
- 616 24. Lamy MC, Zouine M, Fert J, Vergassola M, Couve E, Pellegrini E, et al. CovS/CovR of  
617 group B streptococcus: a two-component global regulatory system involved in virulence. *Mol*  
618 *Microbiol.* 2004;54(5):1250-68. doi: 10.1111/j.1365-2958.2004.04365.x. PubMed PMID:  
619 15554966.
- 620 25. Gryllos I, Grifantini R, Colaprico A, Jiang S, Deforce E, Hakansson A, et al. Mg(2+)  
621 signalling defines the group A streptococcal CsrRS (CovRS) regulon. *Mol Microbiol.*  
622 2007;65(3):671-83. Epub 2007/07/05. doi: 10.1111/j.1365-2958.2007.05818.x. PubMed PMID:  
623 17608796.
- 624 26. Rosinski-Chupin I, Sauvage E, Fouet A, Poyart C, Glaser P. Conserved and specific  
625 features of *Streptococcus pyogenes* and *Streptococcus agalactiae* transcriptional landscapes.  
626 *BMC Genomics.* 2019;20(1):236. Epub 2019/03/25. doi: 10.1186/s12864-019-5613-5. PubMed  
627 PMID: 30902048; PubMed Central PMCID: PMC6431027.
- 628 27. Jiang SM, Cieslewicz MJ, Kasper DL, Wessels MR. Regulation of virulence by a two-  
629 component system in group B streptococcus. *J Bacteriol.* 2005;187(3):1105-13. Epub 2005/01/22.  
630 doi: 10.1128/JB.187.3.1105-1113.2005. PubMed PMID: 15659687; PubMed Central PMCID:  
631 PMC545708.
- 632 28. Jiang SM, Ishmael N, Dunning Hotopp J, Puliti M, Tissi L, Kumar N, et al. Variation in the  
633 group B Streptococcus CsrRS regulon and effects on pathogenicity. *J Bacteriol.* 2008;190(6):1956-  
634 65. Epub 2008/01/22. doi: 10.1128/JB.01677-07. PubMed PMID: 18203834; PubMed Central  
635 PMCID: PMC2258897.

- 636 29. Moulin P, Patron K, Cano C, Zorgani MA, Camiade E, Borezee-Durant E, et al. The  
637 Adc/Lmb System Mediates Zinc Acquisition in *Streptococcus agalactiae* and Contributes to  
638 Bacterial Growth and Survival. J Bacteriol. 2016;198(24):3265-77. Epub 2016/09/28. doi:  
639 10.1128/JB.00614-16. PubMed PMID: 27672194; PubMed Central PMCID: PMC5116930.
- 640 30. Maguin E, Prevost H, Ehrlich SD, Gruss A. Efficient insertional mutagenesis in lactococci  
641 and other gram-positive bacteria. J Bacteriol. 1996;178(3):931-5. Epub 1996/02/01. doi:  
642 10.1128/jb.178.3.931-935.1996. PubMed PMID: 8550537; PubMed Central PMCID:  
643 PMCPMC177749.
- 644 31. Stoyanov JV, Hobman JL, Brown NL. CueR (YbbI) of *Escherichia coli* is a MerR family  
645 regulator controlling expression of the copper exporter CopA. Mol Microbiol. 2001;39(2):502-11.  
646 Epub 2001/01/03. PubMed PMID: 11136469.
- 647 32. Spencer BL, Deng L, Patras KA, Burcham ZM, Sanches GF, Nagao PE, et al. Cas9  
648 Contributes to Group B Streptococcal Colonization and Disease. Frontiers in Microbiology.  
649 2019;10:1930. Epub 2019/09/10. doi: 10.3389/fmicb.2019.01930. PubMed PMID: 31497003;  
650 PubMed Central PMCID: PMCPMC6712506.
- 651 33. Deng L, Mu R, Weston TA, Spencer BL, Liles RP, Doran KS. Characterization of a Two-  
652 Component System Transcriptional Regulator, LtdR, That Impacts Group B Streptococcal  
653 Colonization and Disease. Infect Immun. 2018;86(7). Epub 2018/04/25. doi: 10.1128/IAI.00822-17.  
654 PubMed PMID: 29685987; PubMed Central PMCID: PMCPMC6013667.
- 655 34. Abbas CA, Sibirny AA. Genetic control of biosynthesis and transport of riboflavin and flavin  
656 nucleotides and construction of robust biotechnological producers. Microbiol Mol Biol Rev.  
657 2011;75(2):321-60. Epub 2011/06/08. doi: 10.1128/MMBR.00030-10. PubMed PMID: 21646432;  
658 PubMed Central PMCID: PMCPMC3122625.
- 659 35. Ong CY, Berking O, Walker MJ, McEwan AG. New Insights into the Role of Zinc Acquisition  
660 and Zinc Tolerance in Group A Streptococcal Infection. Infect Immun. 2018;86(6). Epub  
661 2018/03/28. doi: 10.1128/IAI.00048-18. PubMed PMID: 29581188; PubMed Central PMCID:  
662 PMCPMC5964520.

- 663 36. Vitreschak AG, Rodionov DA, Mironov AA, Gelfand MS. Regulation of riboflavin  
664 biosynthesis and transport genes in bacteria by transcriptional and translational attenuation.  
665 Nucleic Acids Res. 2002;30(14):3141-51. Epub 2002/07/24. doi: 10.1093/nar/gkf433. PubMed  
666 PMID: 12136096; PubMed Central PMCID: PMCPMC135753.
- 667 37. Hartmann N, McMurtrey C, Sorensen ML, Huber ME, Kurapova R, Coleman FT, et al.  
668 Riboflavin Metabolism Variation among Clinical Isolates of *Streptococcus pneumoniae* Results in  
669 Differential Activation of Mucosal-associated Invariant T Cells. Am J Respir Cell Mol Biol.  
670 2018;58(6):767-76. Epub 2018/01/23. doi: 10.1165/rcmb.2017-0290OC. PubMed PMID:  
671 29356555; PubMed Central PMCID: PMCPMC6002660.
- 672 38. Capdevila DA, Wang J, Giedroc DP. Bacterial Strategies to Maintain Zinc Metallostasis at  
673 the Host-Pathogen Interface. J Biol Chem. 2016;291(40):20858-68. doi: 10.1074/jbc.R116.742023.
- 674 39. Zhu L, Yerramilli P, Pruitt L, Saavedra MO, Cantu CC, Olsen RJ, et al. Genome-wide  
675 assessment of *Streptococcus agalactiae* genes required for fitness in human whole blood and  
676 plasma. Infect Immun. 2020. Epub 2020/08/05. doi: 10.1128/IAI.00357-20. PubMed PMID:  
677 32747604.
- 678 40. Hooven TA, Catomeris AJ, Bonakdar M, Tallon LJ, Santana-Cruz I, Ott S, et al. The  
679 *Streptococcus agalactiae* Stringent Response Enhances Virulence and Persistence in Human  
680 Blood. Infect Immun. 2018;86(1). Epub 2017/11/08. doi: 10.1128/IAI.00612-17. PubMed PMID:  
681 29109175; PubMed Central PMCID: PMCPMC5736797.
- 682 41. Burcham LR, Hill RA, Caulkins RC, Emerson JP, Nanduri B, Rosch JW, et al.  
683 *Streptococcus pneumoniae* metal homeostasis alters cellular metabolism. Metallomics.  
684 2020;12(9):1416-27. Epub 2020/07/18. doi: 10.1039/d0mt00118j. PubMed PMID: 32676626;  
685 PubMed Central PMCID: PMCPMC7530088.
- 686 42. Burnside K, Lembo A, Harrell MI, Gurney M, Xue L, BinhTran NT, et al. Serine/threonine  
687 phosphatase Stp1 mediates post-transcriptional regulation of hemolysin, autolysis, and virulence  
688 of group B Streptococcus. J Biol Chem. 2011;286(51):44197-210. Epub 2011/11/15. doi:

689 10.1074/jbc.M111.313486. PubMed PMID: 22081606; PubMed Central PMCID:  
690 PMCPMC3243546.

691 43. Lembo A, Gurney MA, Burnside K, Banerjee A, de los Reyes M, Connelly JE, et al.  
692 Regulation of CovR expression in Group B Streptococcus impacts blood-brain barrier penetration.  
693 Mol Microbiol. 2010;77(2):431-43. Epub 2010/05/26. doi: 10.1111/j.1365-2958.2010.07215.x.  
694 PubMed PMID: 20497331; PubMed Central PMCID: PMC2909351.

695 44. Park DM, Overton KW, Liou MJ, Jiao Y. Identification of a U/Zn/Cu responsive global  
696 regulatory two-component system in *Caulobacter crescentus*. Mol Microbiol. 2017;104(1):46-64.  
697 Epub 2016/12/31. doi: 10.1111/mmi.13615. PubMed PMID: 28035693.

698 45. Garber ME, Rajeev L, Kazakov AE, Trinh J, Masuno D, Thompson MG, et al. Multiple  
699 signaling systems target a core set of transition metal homeostasis genes using similar binding  
700 motifs. Mol Microbiol. 2018;107(6):704-17. Epub 2018/01/18. doi: 10.1111/mmi.13909. PubMed  
701 PMID: 29341298.

702 46. Raimunda D, Long JE, Padilla-Benavides T, Sassetti CM, Arguello JM. Differential roles  
703 for the Co(2+) /Ni(2+) transporting ATPases, CtpD and CtpJ, in *Mycobacterium tuberculosis*  
704 virulence. Mol Microbiol. 2014;91(1):185-97. Epub 2013/11/22. doi: 10.1111/mmi.12454. PubMed  
705 PMID: 24255990; PubMed Central PMCID: PMCPMC3885230.

706 47. Stocks CJ, Phan MD, Achard MES, Nhu NTK, Condon ND, Gawthorne JA, et al.  
707 Uropathogenic *Escherichia coli* employs both evasion and resistance to subvert innate immune-  
708 mediated zinc toxicity for dissemination. Proc Natl Acad Sci U S A. 2019;116(13):6341-50. Epub  
709 2019/03/09. doi: 10.1073/pnas.1820870116. PubMed PMID: 30846555; PubMed Central PMCID:  
710 PMCPMC6442554.

711 48. White C, Lee J, Kambe T, Fritsche K, Petris MJ. A role for the ATP7A copper-transporting  
712 ATPase in macrophage bactericidal activity. J Biol Chem. 2009;284(49):33949-56. Epub  
713 2009/10/08. doi: 10.1074/jbc.M109.070201. PubMed PMID: 19808669; PubMed Central PMCID:  
714 PMCPMC2797165.

- 715 49. Sullivan MJ, Ulett GC. Stable Expression of Modified Green Fluorescent Protein in Group  
716 B Streptococci To Enable Visualization in Experimental Systems. *Appl Environ Microbiol.*  
717 2018;84(18). Epub 2018/07/15. doi: 10.1128/AEM.01262-18. PubMed PMID: 30006391.
- 718 50. Ipe DS, Ben Zakour NL, Sullivan MJ, Beatson SA, Ulett KB, Benjamin WHJ, et al. Discovery  
719 and Characterization of Human-Urine Utilization by Asymptomatic-Bacteriuria-Causing  
720 *Streptococcus agalactiae*. *Infect Immun.* 2015;84(1):307-19. doi: 10.1128/IAI.00938-15. PubMed  
721 PMID: 26553467; PubMed Central PMCID: PMC4694007.
- 722 51. Sullivan MJ, Leclercq SY, Ipe DS, Carey AJ, Smith JP, Voller N, et al. Effect of the  
723 *Streptococcus agalactiae* Virulence Regulator CovR on the Pathogenesis of Urinary Tract Infection.  
724 *J Infect Dis.* 2017;215(3):475-83. doi: 10.1093/infdis/jiw589. PubMed PMID: 28011914.
- 725 52. Untergasser A, Cutcutache I, Koressaar T, Ye J, Faircloth BC, Remm M, et al. Primer3--  
726 new capabilities and interfaces. *Nucleic Acids Res.* 2012;40(15):e115. Epub 2012/06/26. doi:  
727 10.1093/nar/gks596. PubMed PMID: 22730293; PubMed Central PMCID: PMCPMC3424584.
- 728 53. Untergasser A, Nijveen H, Rao X, Bisseling T, Geurts R, Leunissen JA. Primer3Plus, an  
729 enhanced web interface to Primer3. *Nucleic Acids Res.* 2007;35(Web Server issue):W71-4. doi:  
730 10.1093/nar/gkm306. PubMed PMID: 17485472; PubMed Central PMCID: PMC1933133.
- 731 54. Bustin SA, Benes V, Garson JA, Hellems J, Huggett J, Kubista M, et al. The MIQE  
732 guidelines: minimum information for publication of quantitative real-time PCR experiments. *Clin*  
733 *Chem.* 2009;55(4):611-22. doi: 10.1373/clinchem.2008.112797. PubMed PMID: 19246619.
- 734 55. Sullivan MJ, Forde BM, Prince DW, Ipe DS, Ben Zakour NL, Davies MR, et al. Complete  
735 Genome Sequence of Serotype III *Streptococcus agalactiae* Sequence Type 17 Strain 874391.  
736 *Genome Announcements.* 2017;5(42). Epub 2017/10/21. doi: 10.1128/genomeA.01107-17.  
737 PubMed PMID: 29051249.
- 738 56. Pfaffl MW. A new mathematical model for relative quantification in real-time RT-PCR.  
739 *Nucleic Acids Res.* 2001;29(9):e45. Epub 2001/05/09. PubMed PMID: 11328886; PubMed Central  
740 PMCID: PMC55695.

- 741 57. Anders S, Pyl PT, Huber W. HTSeq--a Python framework to work with high-throughput  
742 sequencing data. *Bioinformatics*. 2015;31(2):166-9. Epub 2014/09/28. doi:  
743 10.1093/bioinformatics/btu638. PubMed PMID: 25260700; PubMed Central PMCID:  
744 PMCPMC4287950.
- 745 58. Love MI, Huber W, Anders S. Moderated estimation of fold change and dispersion for RNA-  
746 seq data with DESeq2. *Genome Biol*. 2014;15(12):550. Epub 2014/12/18. doi: 10.1186/s13059-  
747 014-0550-8. PubMed PMID: 25516281; PubMed Central PMCID: PMCPMC4302049.
- 748 59. Sullivan MJ, Ulett GC. Evaluation of hematogenous spread and ascending infection in the  
749 pathogenesis of acute pyelonephritis due to group B streptococcus in mice. *Microb Pathog*.  
750 2020;138:103796. Epub 2019/10/16. doi: 10.1016/j.micpath.2019.103796. PubMed PMID:  
751 31614193.
- 752 60. Charbonneau ARL, Forman OP, Cain AK, Newland G, Robinson C, Bournnell M, et al.  
753 Defining the ABC of gene essentiality in streptococci. *BMC Genomics*. 2017;18(1):426. Epub  
754 2017/06/02. doi: 10.1186/s12864-017-3794-3. PubMed PMID: 28569133; PubMed Central PMCID:  
755 PMCPMC5452409.
- 756 61. Barquist L, Mayho M, Cummins C, Cain AK, Boinett CJ, Page AJ, et al. The TraDIS toolkit:  
757 sequencing and analysis for dense transposon mutant libraries. *Bioinformatics*. 2016;32(7):1109-  
758 11. Epub 2016/01/23. doi: 10.1093/bioinformatics/btw022. PubMed PMID: 26794317; PubMed  
759 Central PMCID: PMCPMC4896371.
- 760 62. Page AJ, Bastkowski S, Yasir M, Turner AK, Le Viet T, Savva GM, et al. AlbaTraDIS:  
761 Comparative analysis of large datasets from parallel transposon mutagenesis experiments. *PLoS*  
762 *Comput Biol*. 2020;16(7):e1007980. Epub 2020/07/18. doi: 10.1371/journal.pcbi.1007980. PubMed  
763 PMID: 32678849.

764

765



766 **Figure Legends**

767 **Figure 1. Growth analysis of GBS in rich and limiting medium and subjected to Zn**  
768 **intoxication.** WT, *copY*<sup>-</sup> and *covR*<sup>-</sup> mutants were grown in nutrient-rich THB (A), THB medium  
769 supplemented with 1.5 mM Zn (B), nutrient-limited CDM (C) or CDM supplemented with 0.1 mM  
770 Zn (D) to examine responses to Zn stress. Bars show mean ± S.E.M (*n*=3 biological repeats).

771

772 **Figure 2. Intracellular accumulation of Zn, Cu, Mn, Fe or Mg in *copY*<sup>-</sup> GBS with or without**  
773 **Zn stress.** Cells of *copY*<sup>-</sup> GBS were exposed to Zn (0.25 mM; green bars) and cellular metal  
774 content was compared to unexposed controls (THB only; white bars) using Inductively coupled  
775 plasma optical emission spectrometry (ICP-OES). Metal content (μg.g<sup>-1</sup> dry weight biomass)  
776 normalised to WT cells from the same condition is shown as a percentage. Bars show mean ±  
777 S.E.M (*n*=3 biological repeats). Dotted line at 100% represents values equivalent to WT GBS.

778

779 **Figure 3. Cross-regulation of Zn and Cu stress responses by *copY* and *covR*.** Transcripts of  
780 *sczA* (A), *copY* (B), *czcD* (C) and *copA* (D) were quantified by qRT-PCR from cultures of WT,  
781 *copY*<sup>-</sup>, *covR*<sup>-</sup> and *sczA*<sup>-</sup> mutants supplemented with Zn (0.25 mM) or Cu (0.5 mM) and compared  
782 to unexposed (THB only) controls (*n*=4). Absolute transcript amounts were normalized using  
783 housekeeping *dnaN* and generated from standard curves using GBS genomic DNA. Transcripts  
784 of *sczA* and *copY* were not detected (n.d.) in their respective mutant strains. Quantities were  
785 compared using ordinary one-way ANOVA and Holm-Sidak multiple comparisons. \*\* *P* < 0.01,  
786 \*\*\**P* < 0.001.

787

788 **Figure 4. The CopY-responsive GBS transcriptome and the impact of Zn stress.** Volcano  
789 plot showing data from RNASeq of WT GBS cultures compared to *copY*<sup>-</sup> GBS in THB (A), or THB

790 supplemented with 0.25 mM Zn (B). Transcripts up- or down-regulated in response to Zn ( $n=4$ ,  $>\pm$   
791 2-fold, FDR  $<0.05$ ) are highlighted in red and blue, respectively. Dotted lines show False  
792 discovery rate (FDR; q-value) and fold change cut-offs. Grey points indicate genes that were  
793 unchanged. Selected genes are identified individually with black lines. Expression of individual  
794 genes from RNAseq analyses (C) showing mean Fragments Per Kilobase of transcript per Million  
795 mapped reads (FPKM) values for each condition in each strain. Data were compared with  
796 DESeq2 (\* P-adj  $<0.05$  and  $\pm 2$ -fold;  $n=4$ ). † indicates genes significantly altered in response to  
797 Zn stress in WT GBS as identified in previous work [21]. # reads mapped to truncated *copY* gene  
798 in  $\Delta copY$  strain.

799

800 **Figure 5. Cross system effects of CopY on Zn stress responses.** Expression ratios ( $\log_2FC$ )  
801 of selected genes, identified by RNAseq as linked to CopY and Zn stress, were compared using  
802 qRTPCR as indicated, using RNA isolated from WT or *copY*<sup>-</sup> GBS grown in THB or THB  
803 supplemented with 0.25 mM Zn ( $n=4$ ). Five distinct activation states were apparent based on Zn  
804 and/or CopY dependency. Fold change values were calculated using *dnaN* as housekeeper and  
805  $\Delta\Delta^{CT}$  values incorporated primer efficiency values as previously described [56].

806

807 **Figure 6. The effect of riboflavin on Zn stress resistance in GBS.** WT, *copY*<sup>-</sup> and *ribD*<sup>-</sup>  
808 mutants were grown in MDM supplemented with 0.1 mM Zn (A) or MDM supplemented with 0.1  
809 mM Zn and 0.5 mg/L riboflavin (B). Bars show mean  $\pm$  S.E.M ( $n=3$  biological repeats) measures  
810 of attenuation ( $D$  at 600<sub>nm</sub>).

811

812 **Figure 7. CopY likely operates as a cross-system regulator in numerous gram-positive**  
813 **bacteria.** Alignment of CopY shows a high degree of conservation ( $>97\%$  identity between

814 reference *S. agalactiae* strains) (a). Alignment of *S. agalactiae* CopY with other *Streptococcus*  
815 and *Enterococcus* strains. Highlighted are two conserved putative CXC motifs that are predicted  
816 to bind Cu and/or Zn at the C-terminus; amino acids that are >90% conserved are shaded in red,  
817 as indicated (b). Predicted structural model of *S. agalactiae* CopY and schematic representation  
818 of the putative metal binding site at the C-terminus of the protein, adapted from (Cobine *et al.*,  
819 2002) (c). Structural alignments of predicted CopY proteins from *Streptococcus* and  
820 *Enterococcus* strains indicate overlapping protein conformation despite modest conservation of  
821 amino acid identity (d).

822

823 **Figure 8. Mutation in *copY* and *covR* have major implications in colonization and**  
824 **disseminated spread of GBS bloodstream infection.** Virulence of WT (grey squares),  $\Delta copY$   
825 (red diamonds) or  $\Delta covR$  GBS (purple circles) in a mouse model of disseminated infection.  
826 C57BL/6 mice (6-8 weeks old) were intravenously injected with  $10^7$  bacteria; bacteremia and  
827 disseminated spread of bacteria to brain, heart, lungs, liver, spleen, kidneys and bladder were  
828 monitored at 24h post infection. CFU were enumerated and counts were normalized using  
829 tissue mass in g. Viable Cell counts of 0 CFU/mL were assigned a value of 1 to enable  
830 visualisation on  $\log_{10}$  y-axes. Lines and bars show median and interquartile ranges and data are  
831 pooled from 2-3 independent experiments each containing n=10 mice; groups infected with  
832 mutants were compared to WT group using Kruskal-Wallis ANOVA with Dunn's corrections for  
833 multiple comparisons (\*P < 0.05, \*\*P < 0.01, \*\*\* P < 0.001).

834

835 **Figure 9. Defining the Zn stress resistome of *S. agalactiae* to identify novel factors in**  
836 **bacterial responses to Zn intoxication.** A super-saturated ISS1 *S. agalactiae* insertion library  
837 was subjected to Zn stress and compared to control incubation without Zn to define the Zn

838 resistome (A). Transposon-directed insertion sequencing (TraDIS) identified 26 genes over-  
839 represented (blue) and 12 under-represented (red) during Zn stress (cutoffs: FDR < 0.05, fold-  
840 change  $\pm 4$ ). Illustrative read-mapping of *ISS1* insertion sites (B-D) displaying differences between  
841 non-exposed control (grey) or Zn stress conditions (green) for selected genes; over-represented  
842 *argR/arcR* (B) and under-represented *stp1/stk1* (C) or *yceG* (D). Vertical lines in B-D represent  
843 pooled read counts at each base within locus, with coding sequences of genes represented by  
844 grey arrows beneath. Data are compiled from 3 independent experiments.

845

846 **Figure 10. Validation of TraDIS hits by isogenic mutation and phenotypic comparisons for**  
847 **selected genes of the Zn stress resistomes.** WT *S. agalactiae* (A) and mutants with deletions  
848 in genes identified as important during in Zn intoxication by TraDIS (B-C) were examined for  
849 growth phenotypes in CDM (a nutrient-limited medium) or CDM supplemented with 0.1, 0.25 and  
850 0.5mM Zn as indicated. Points show means of attenuation (600nm) and bars show s.e.m. ( $n \geq 3$ ).

851

852

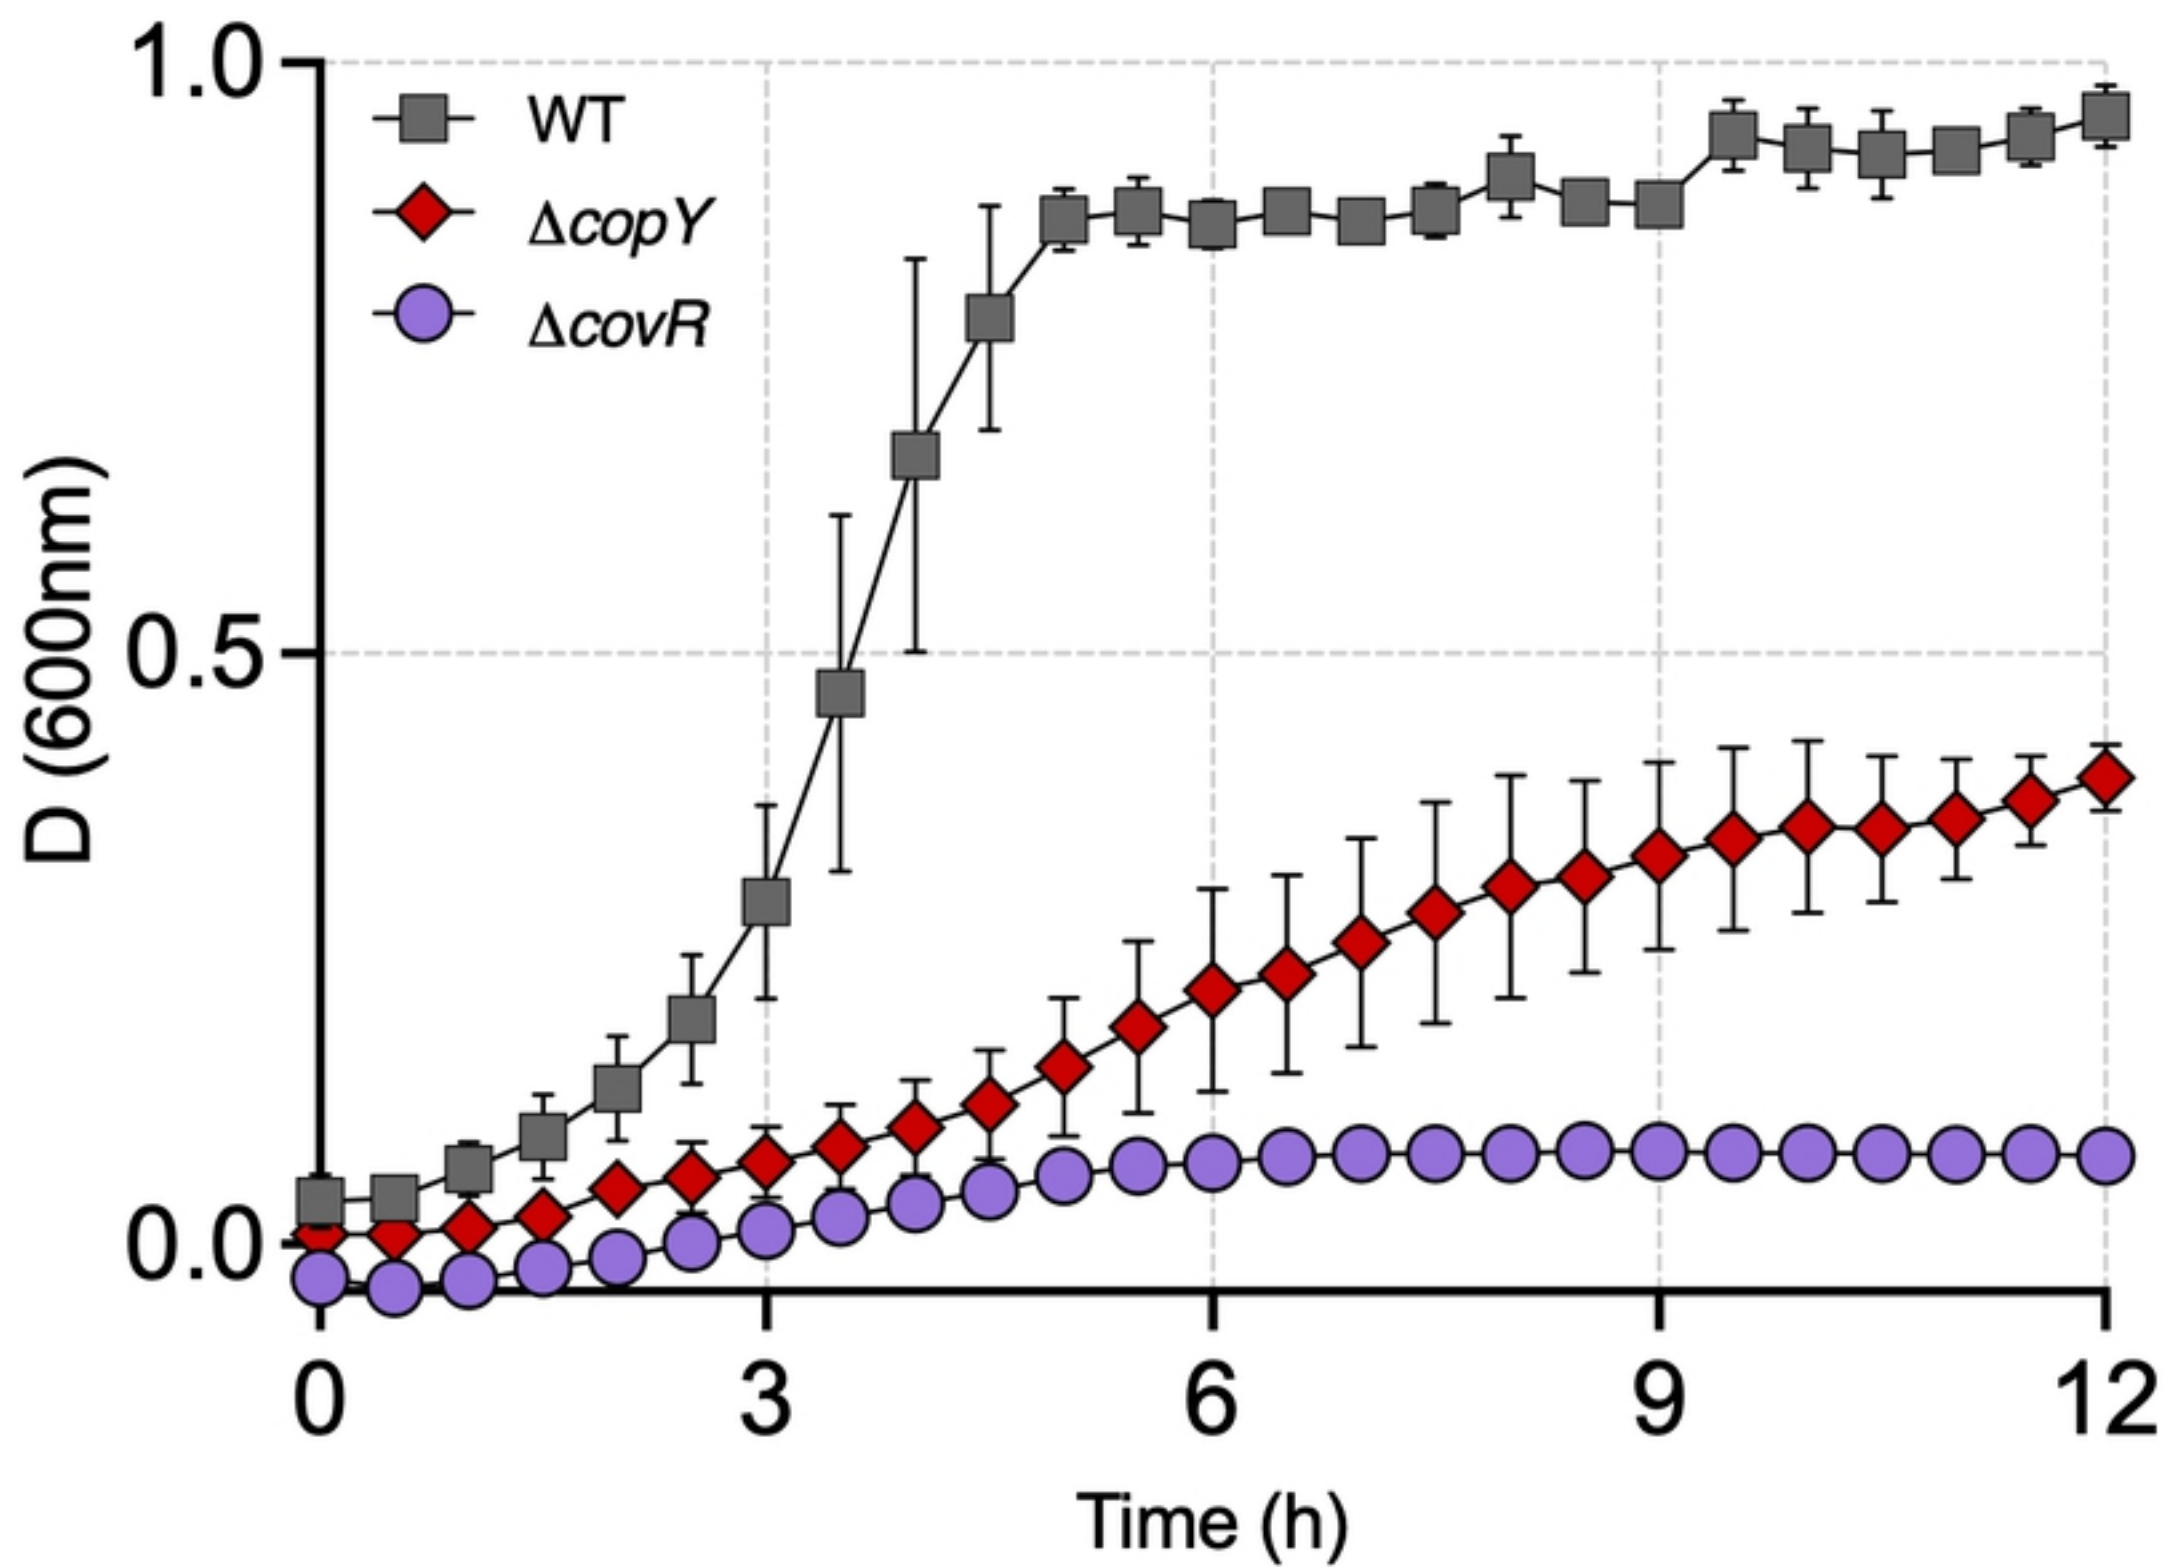

Figure

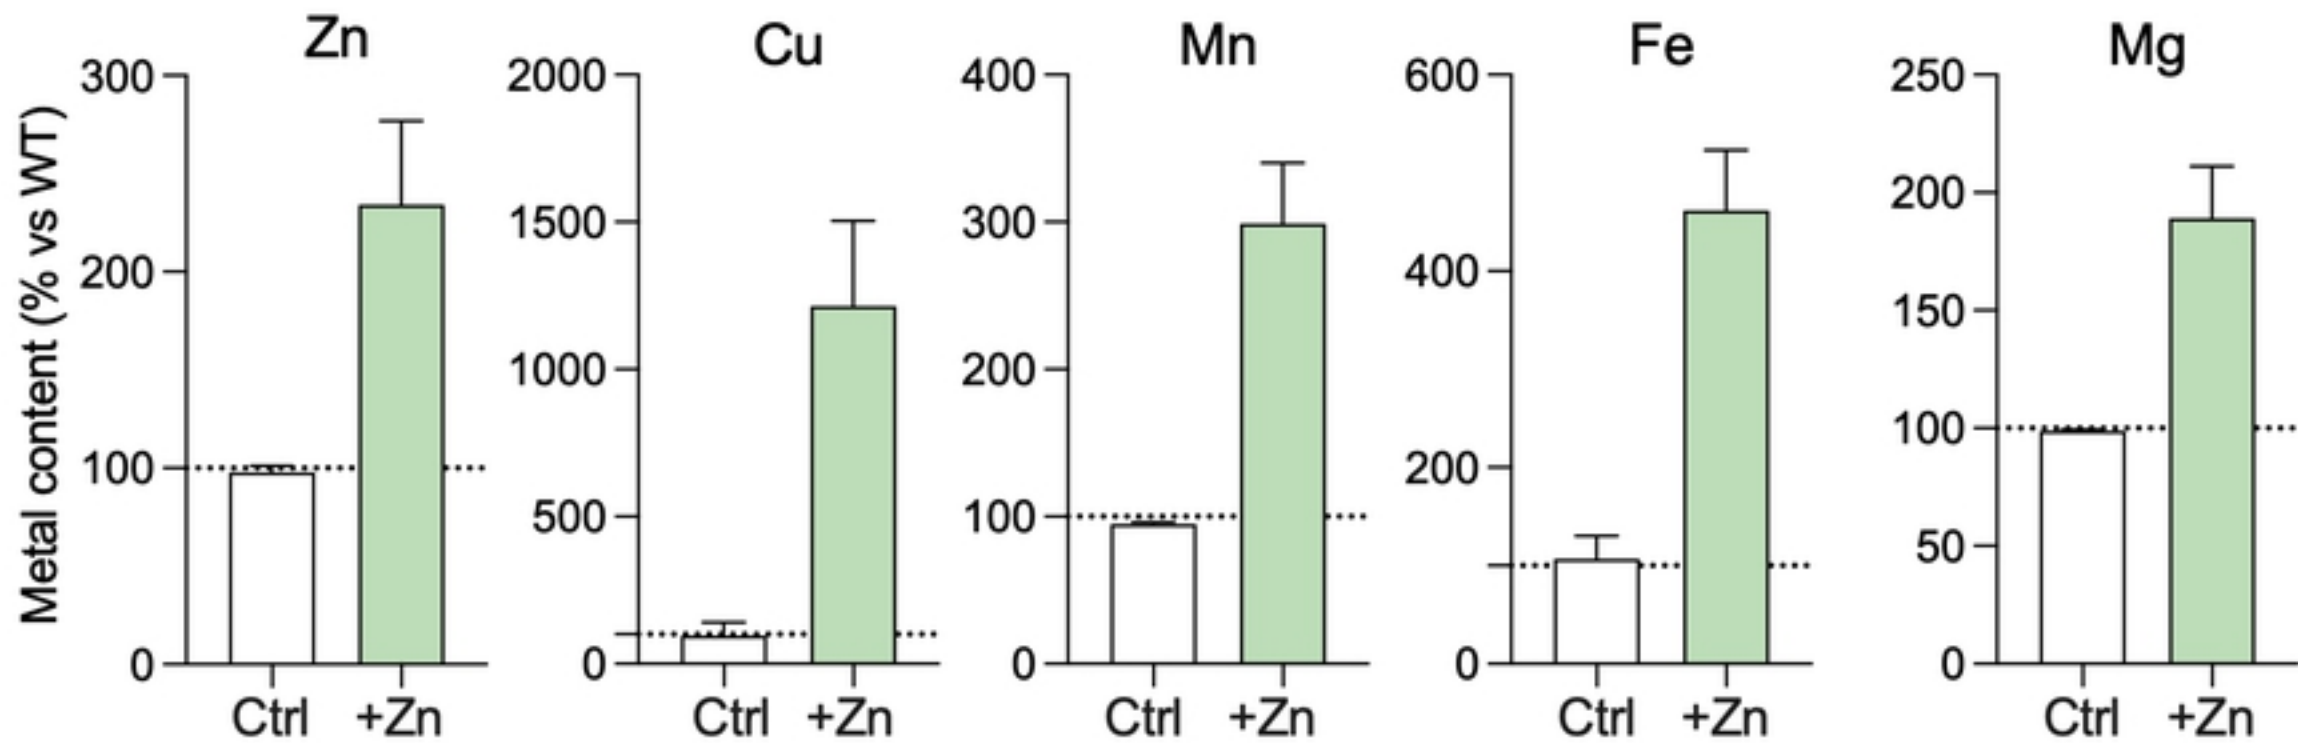

Figure

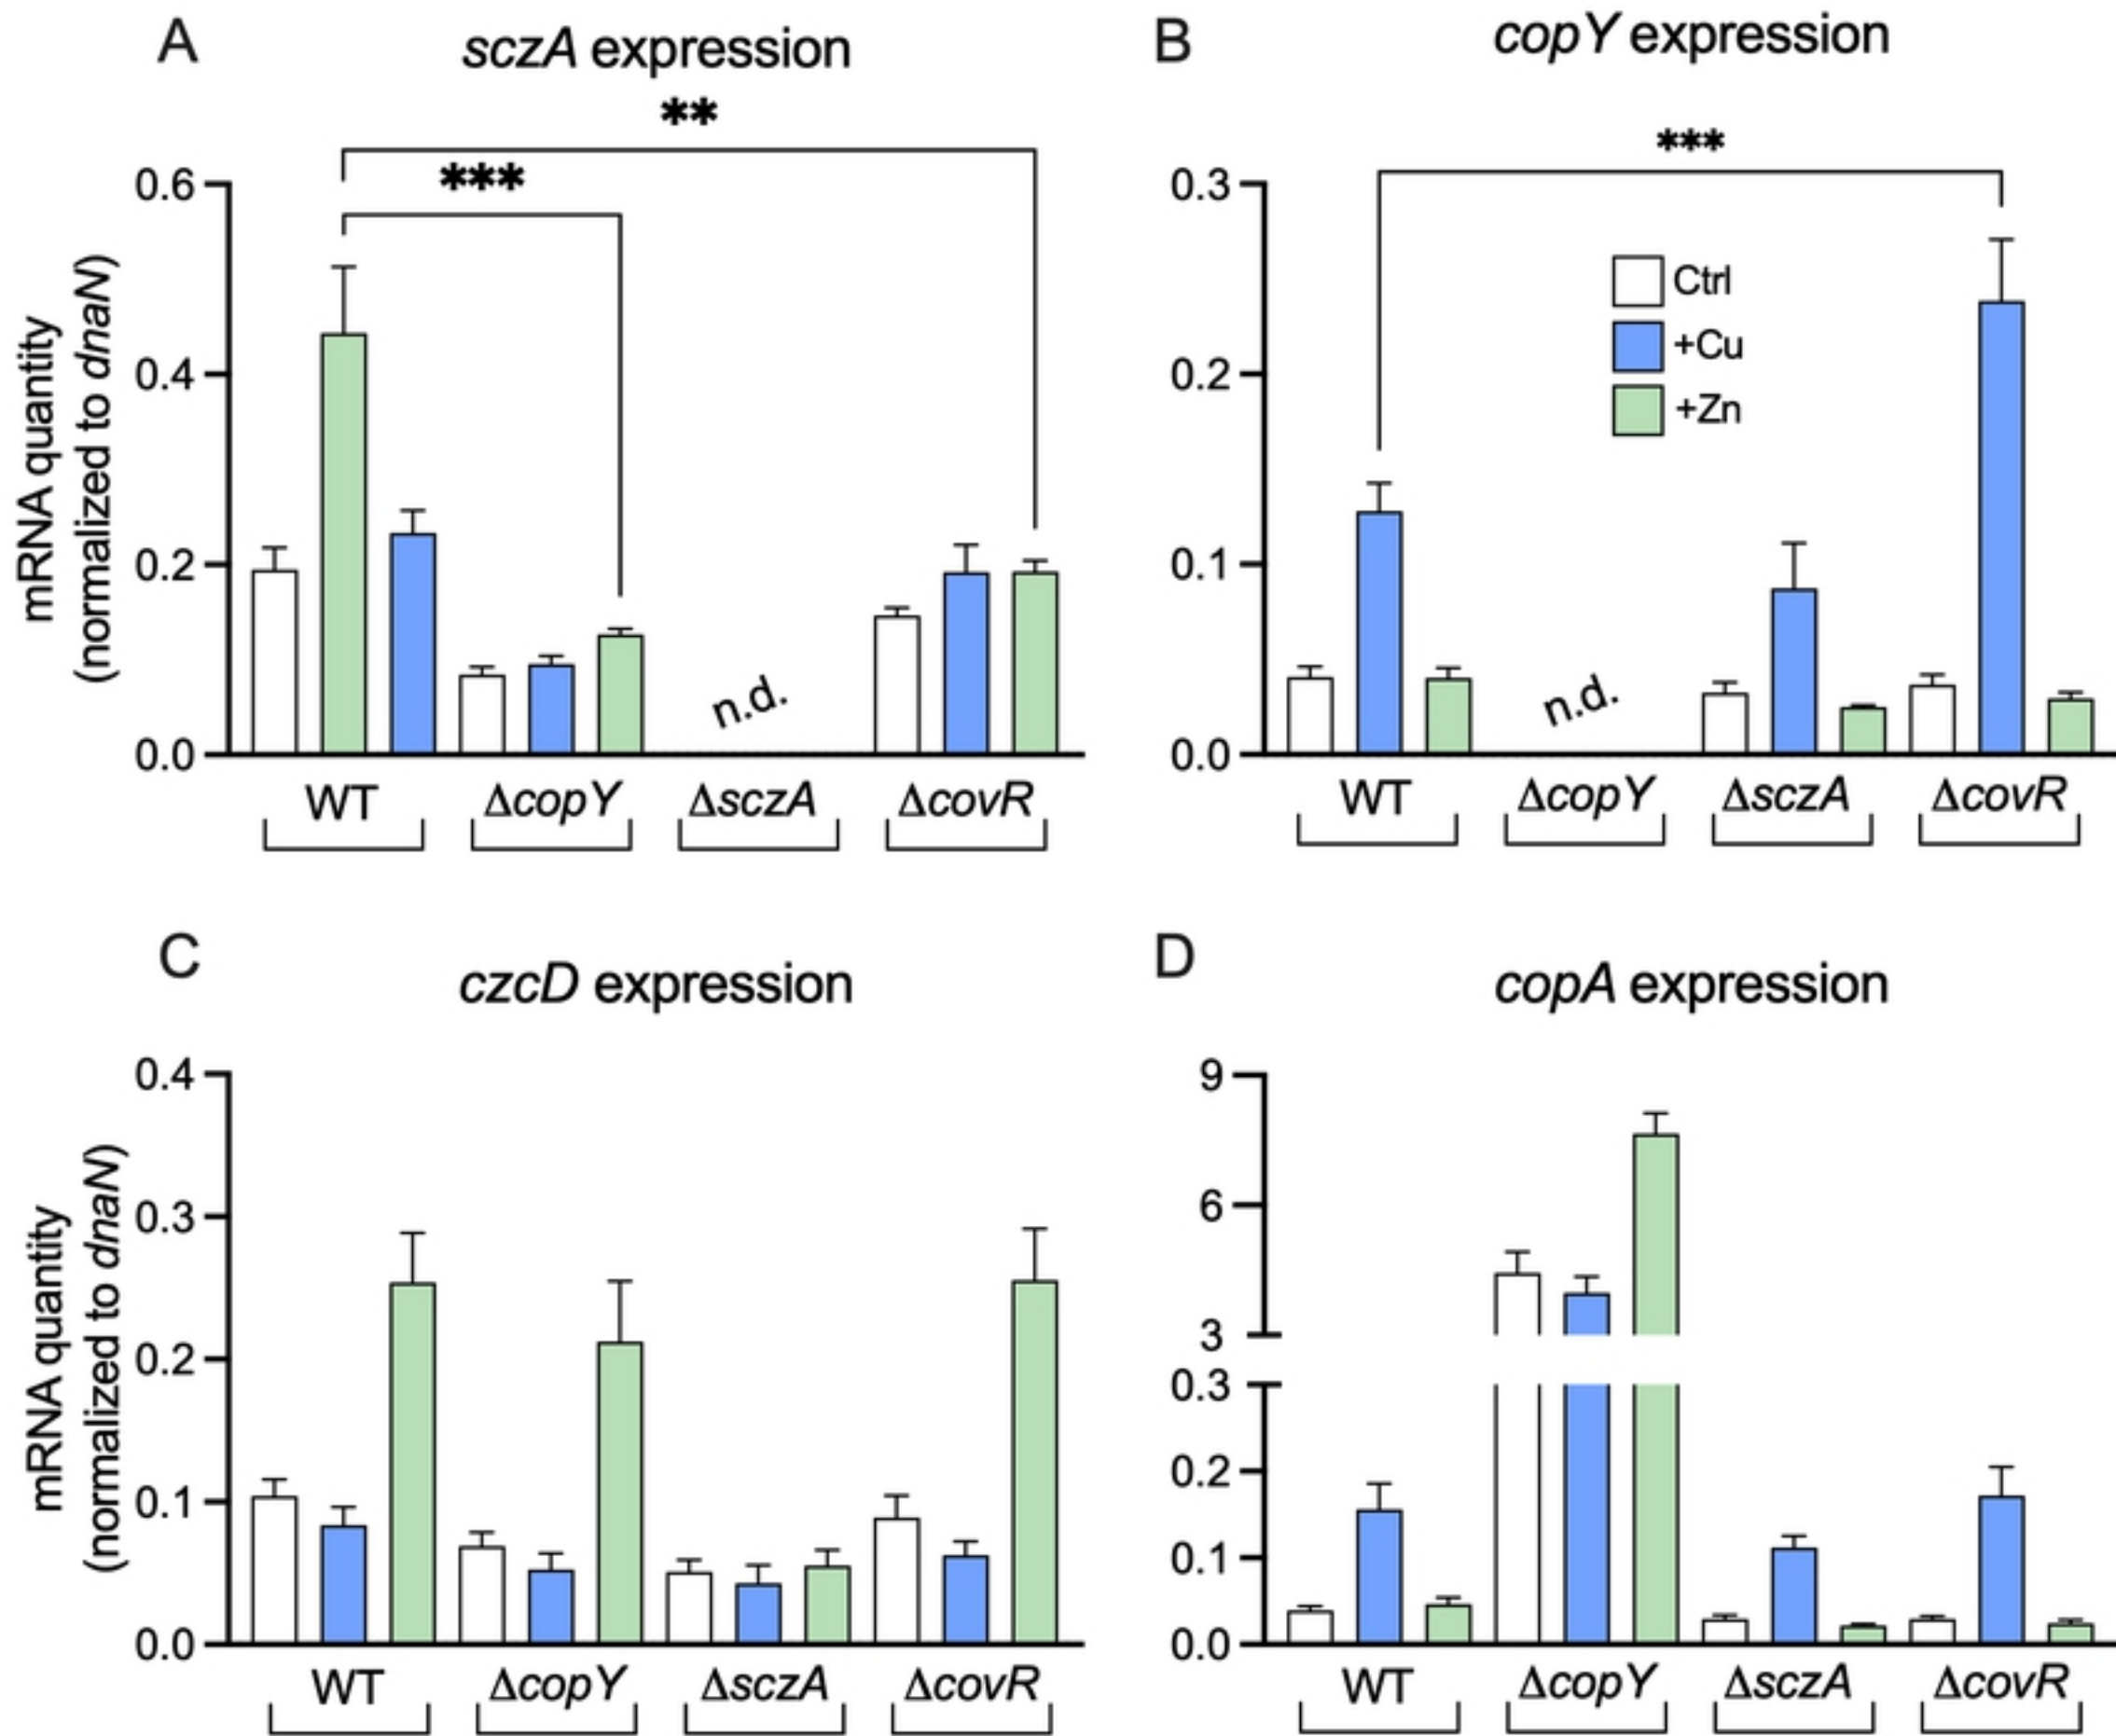

Figure

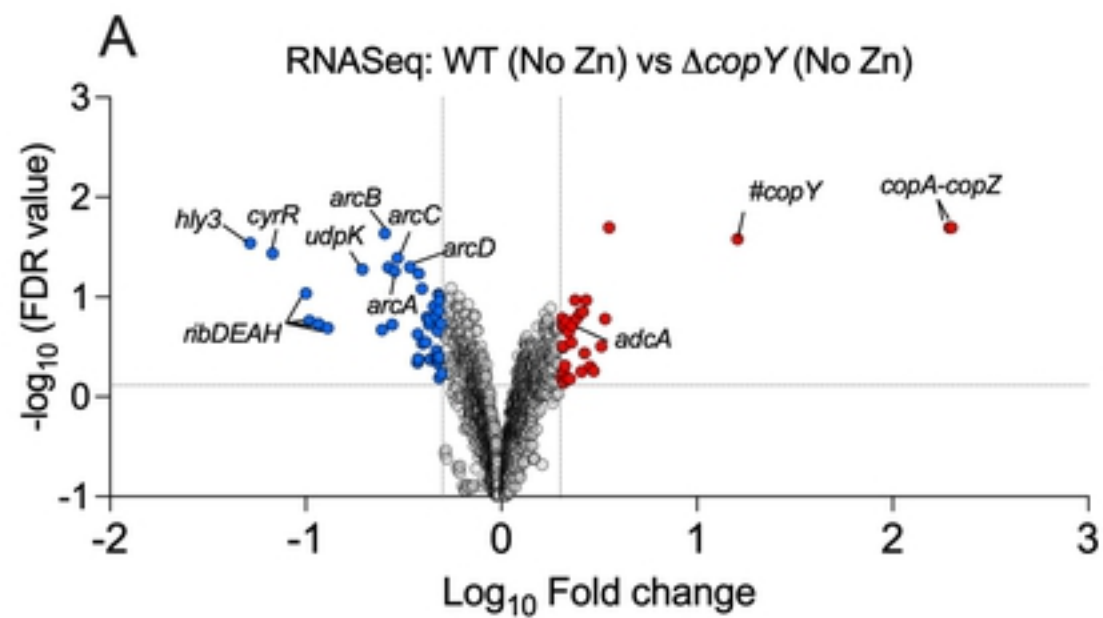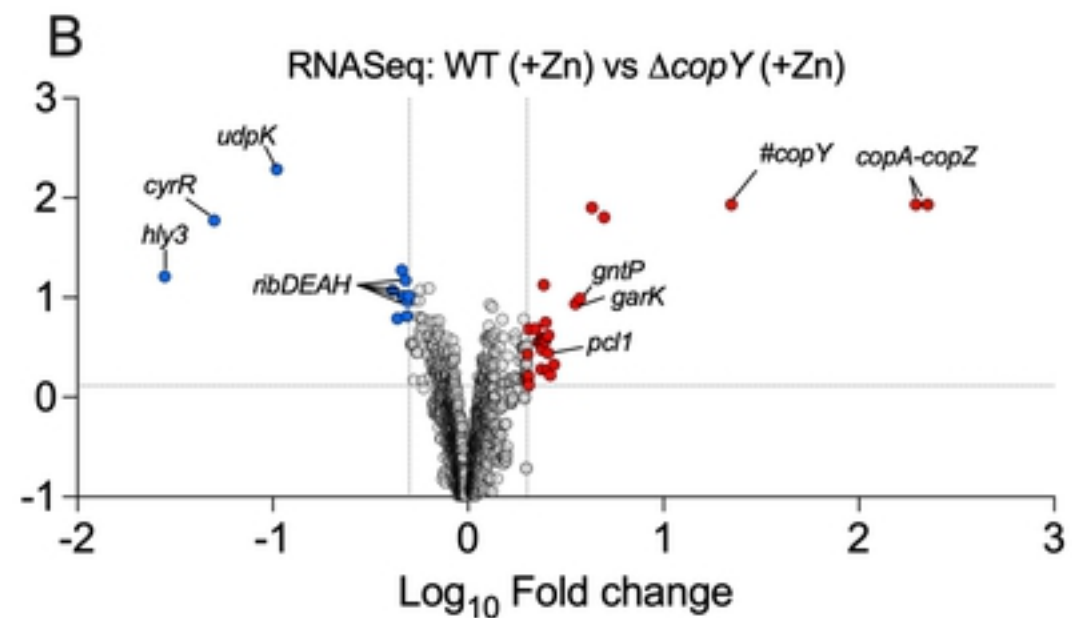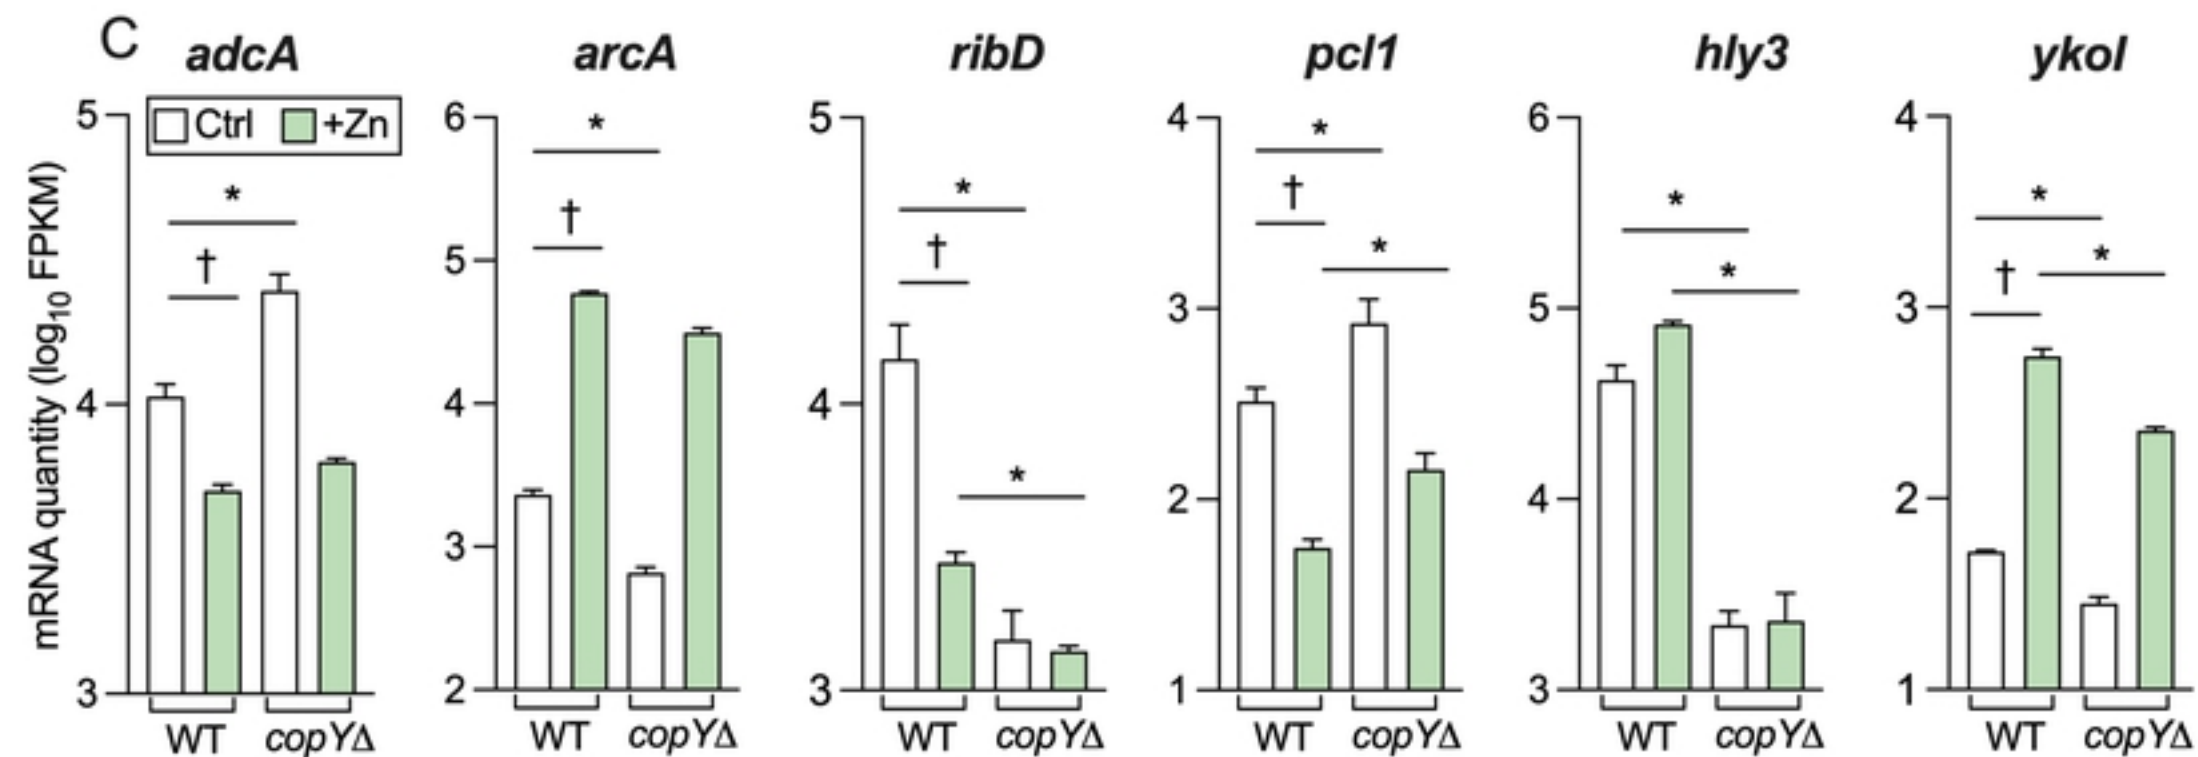

Figure



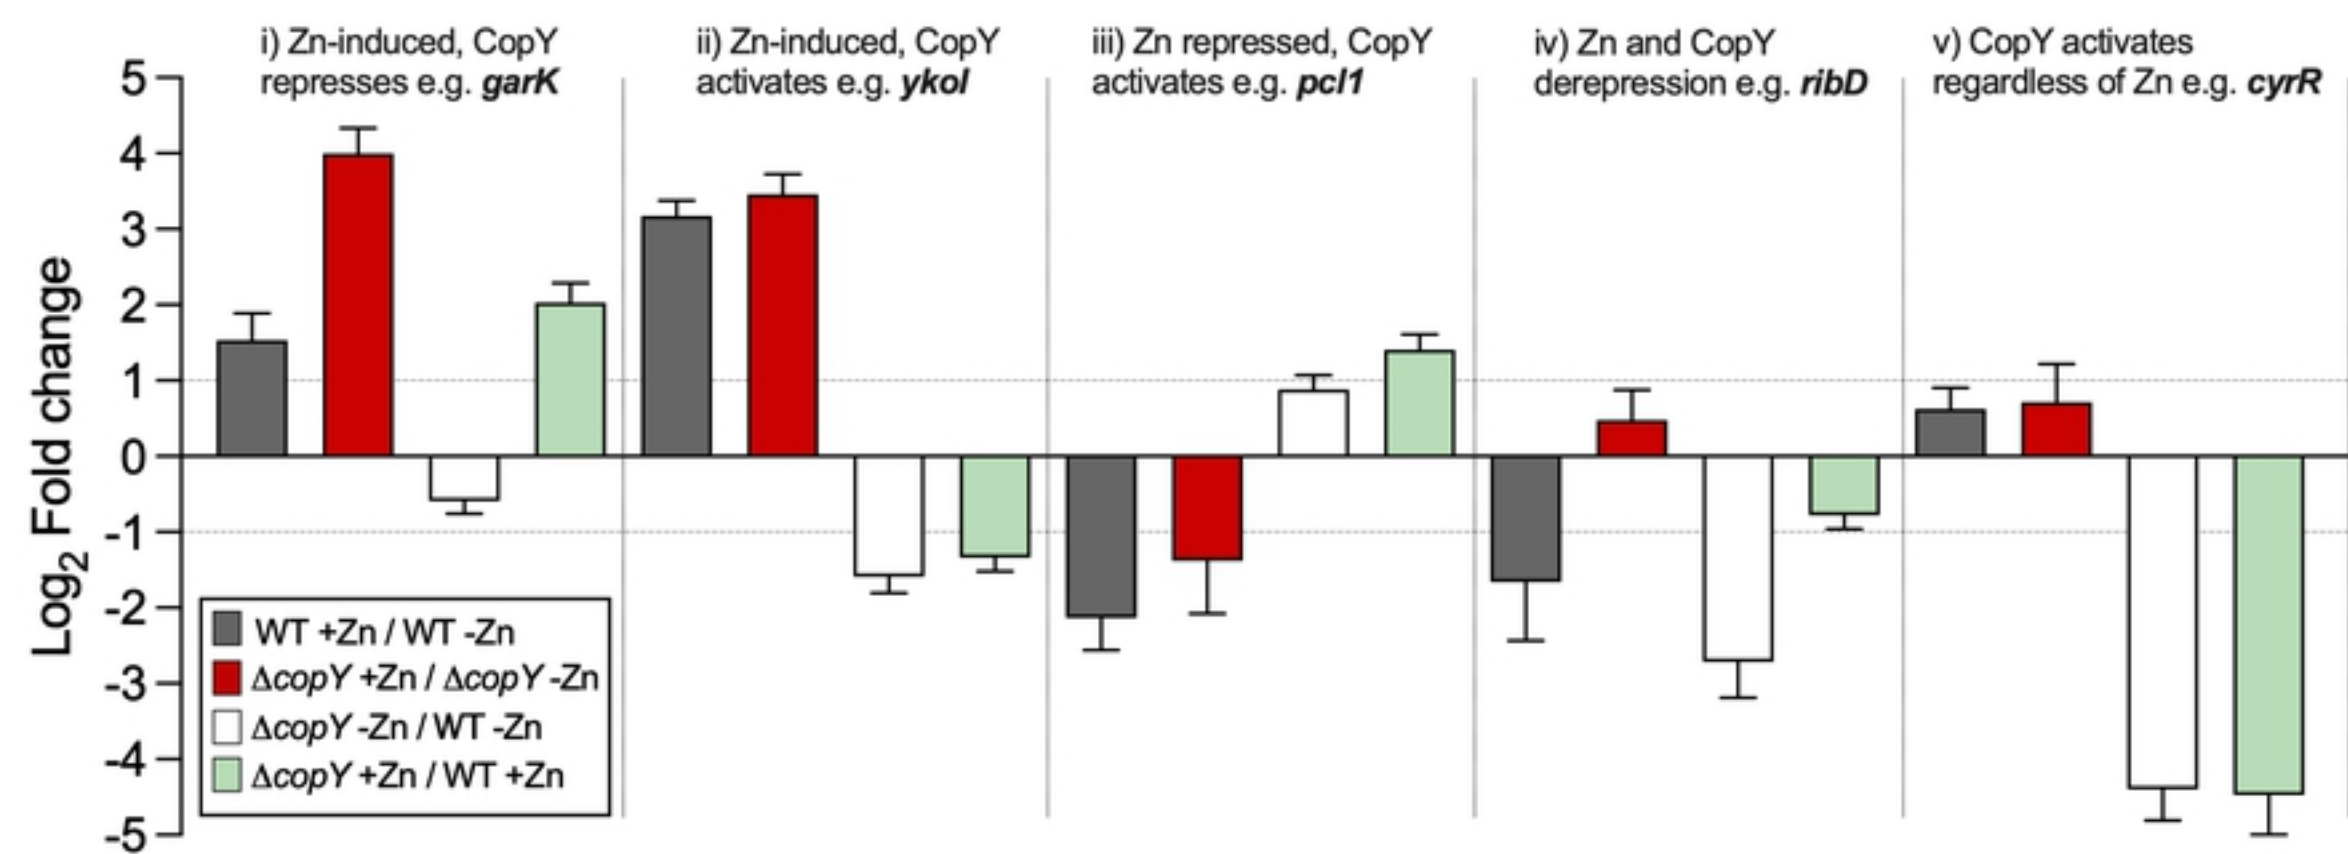

Figure

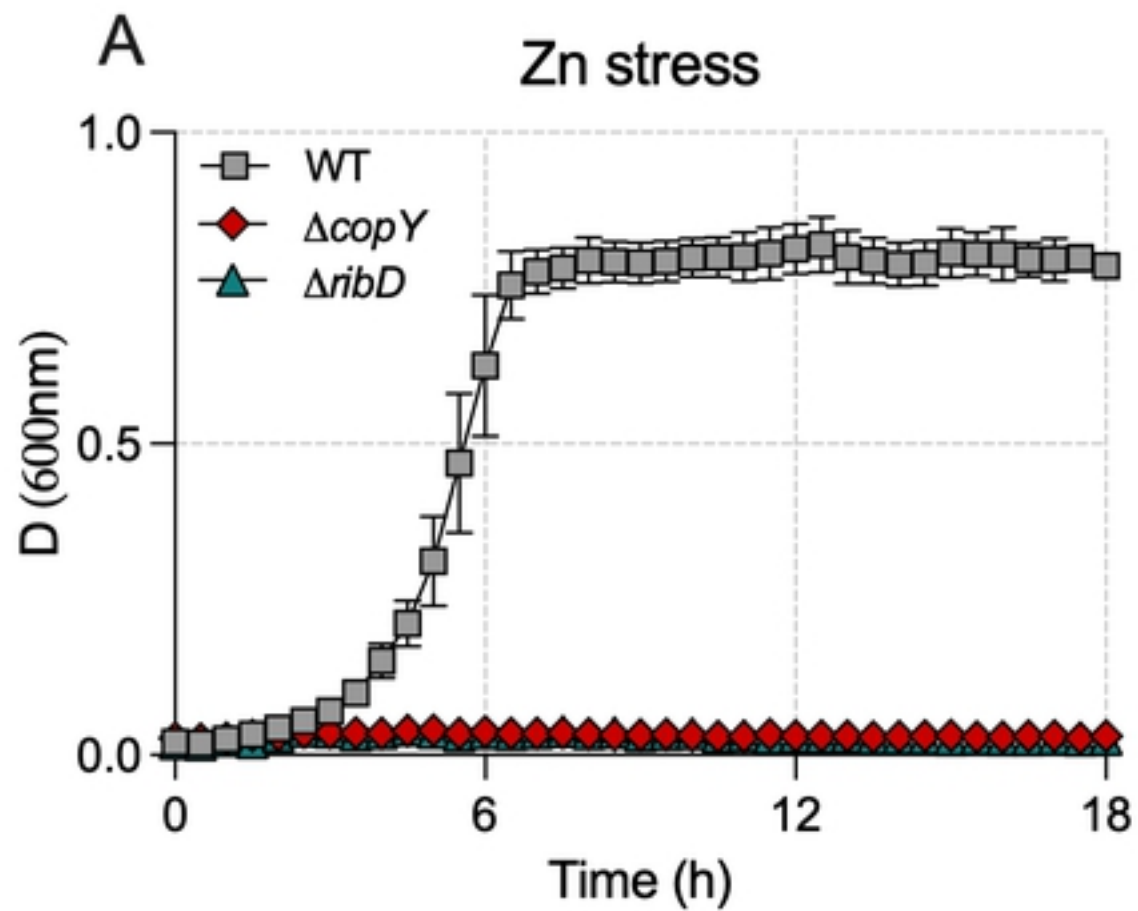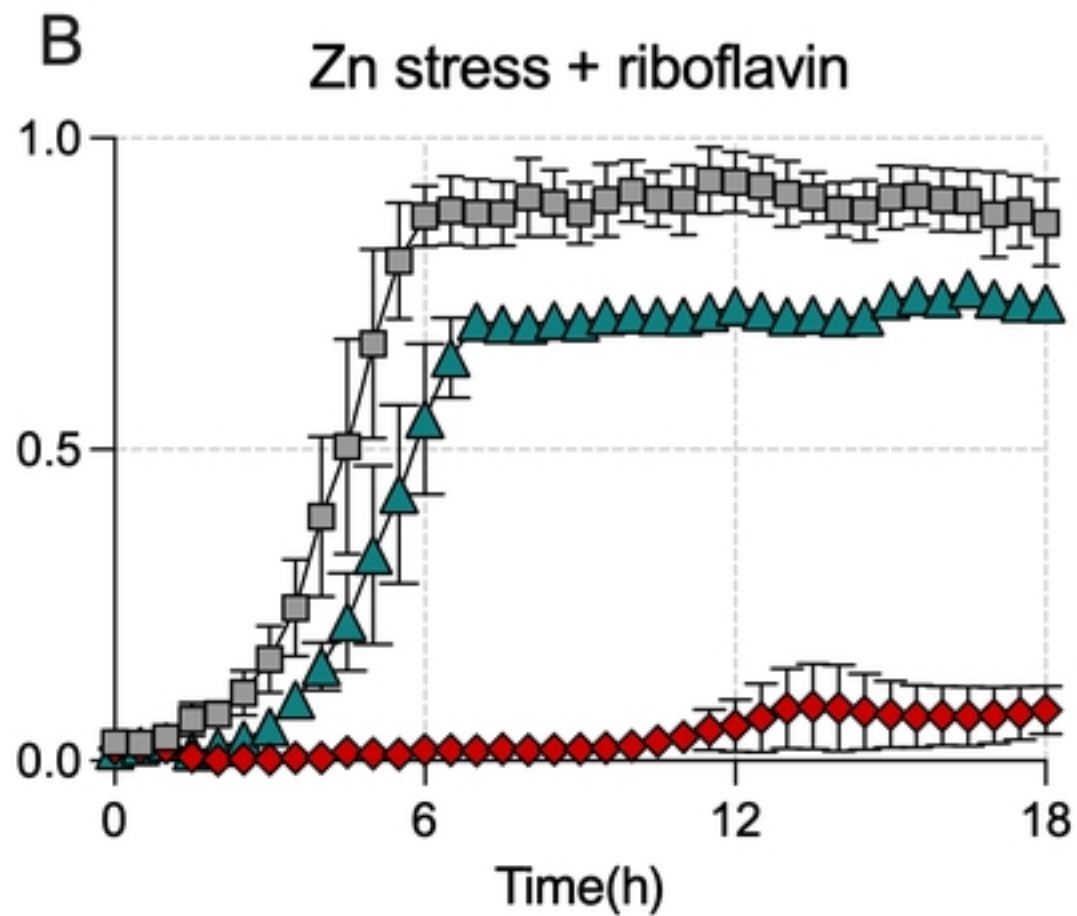

Figure

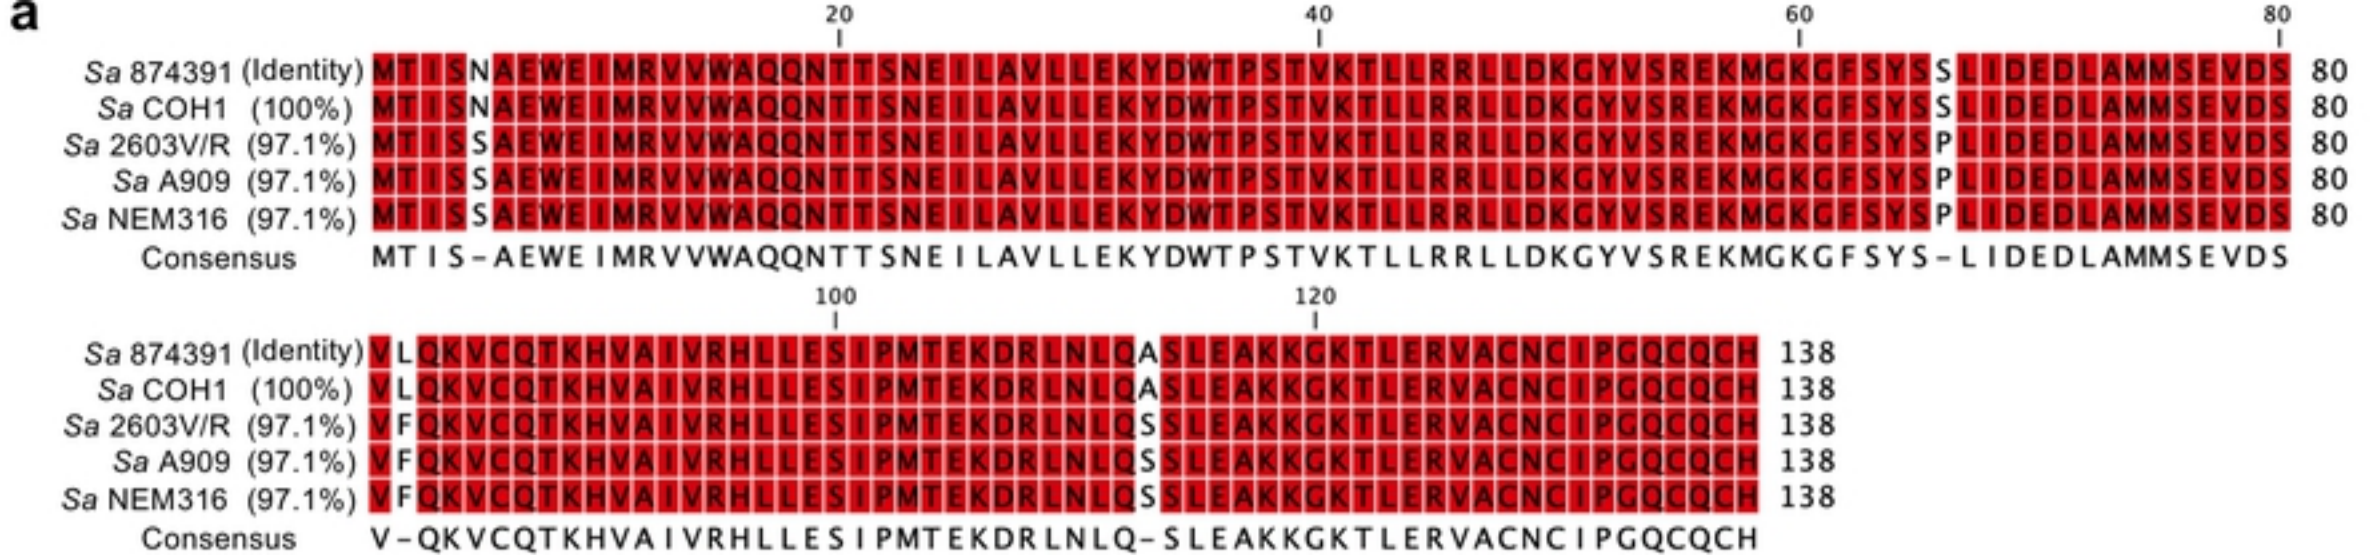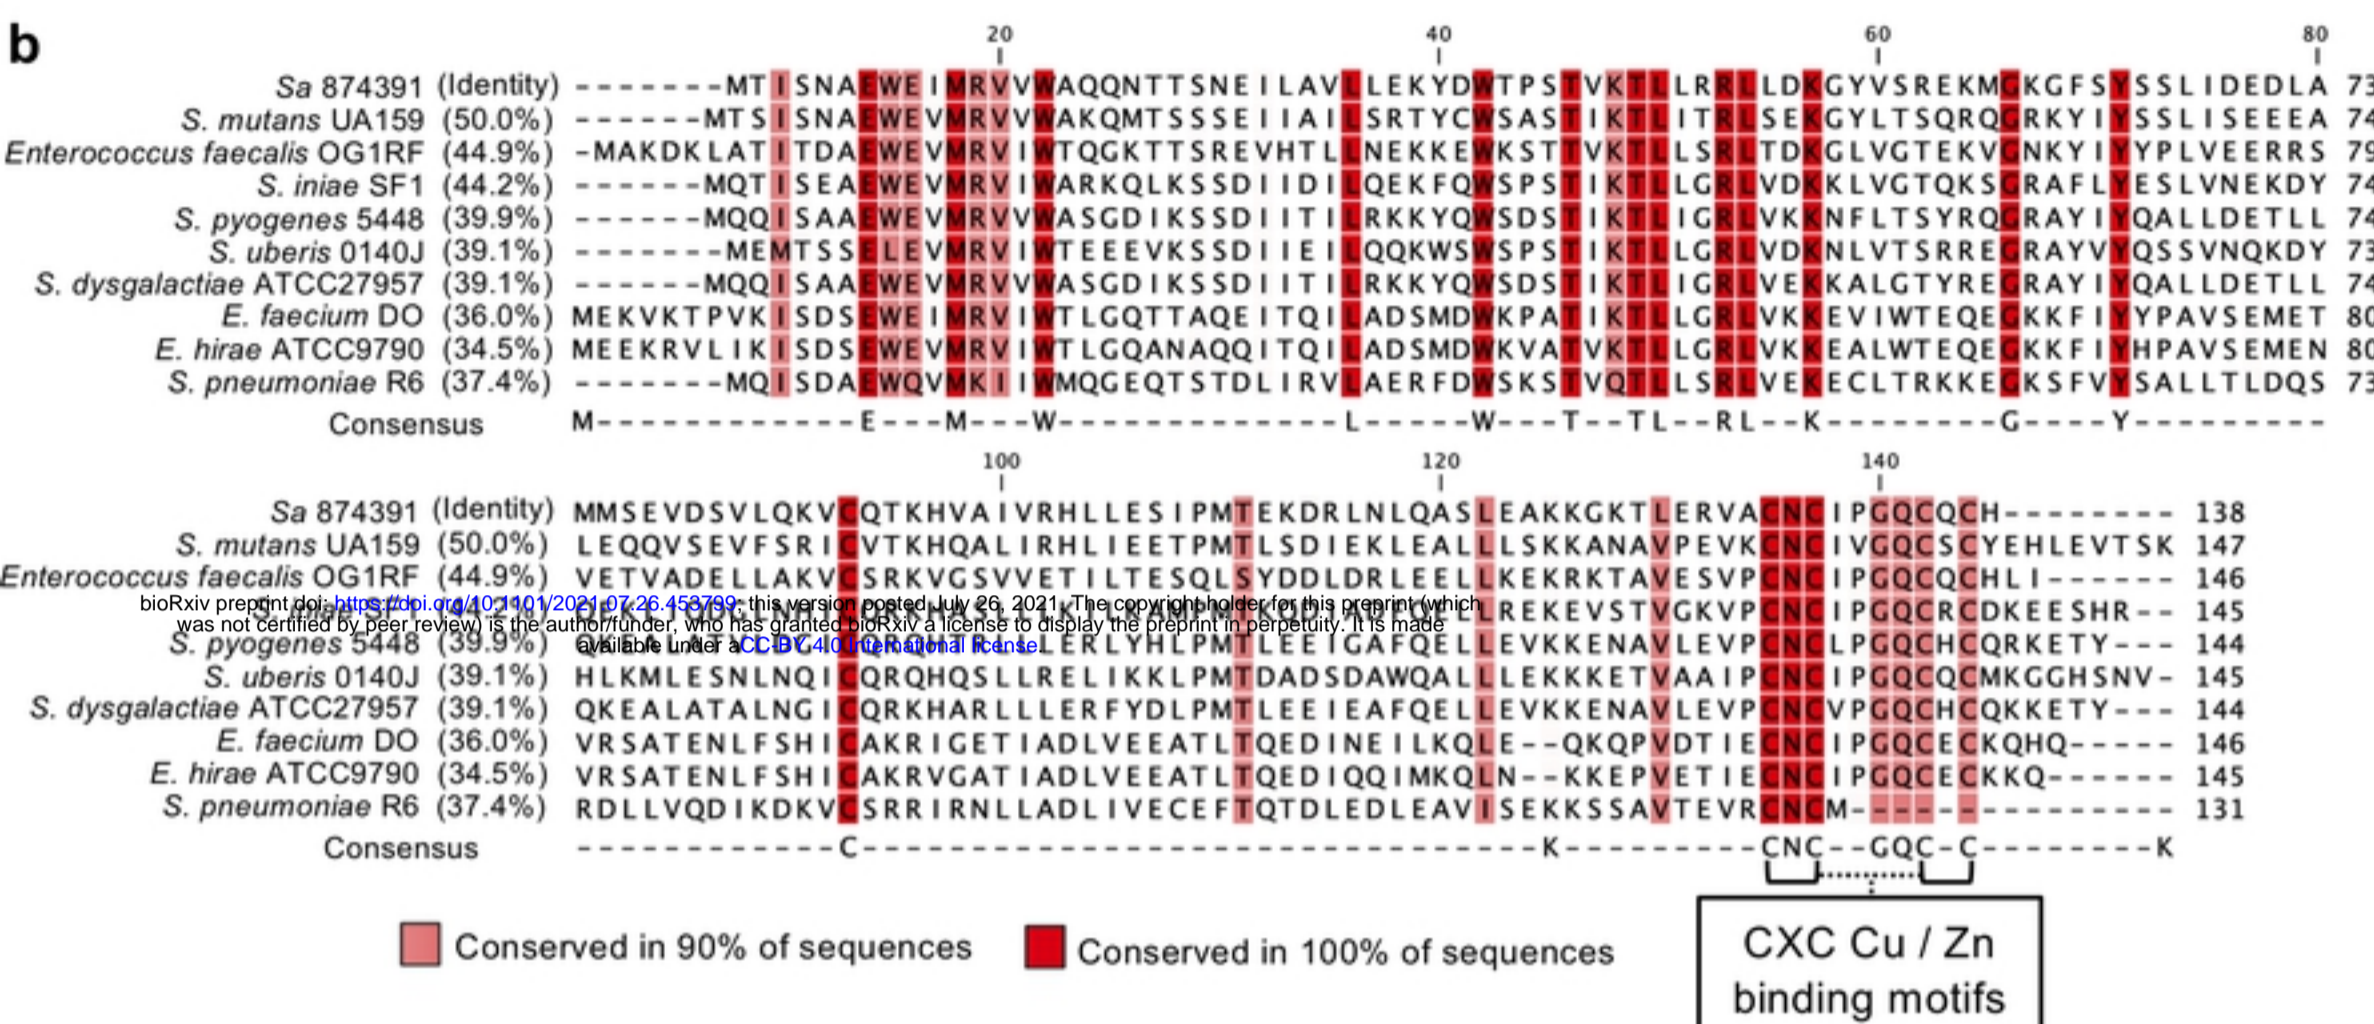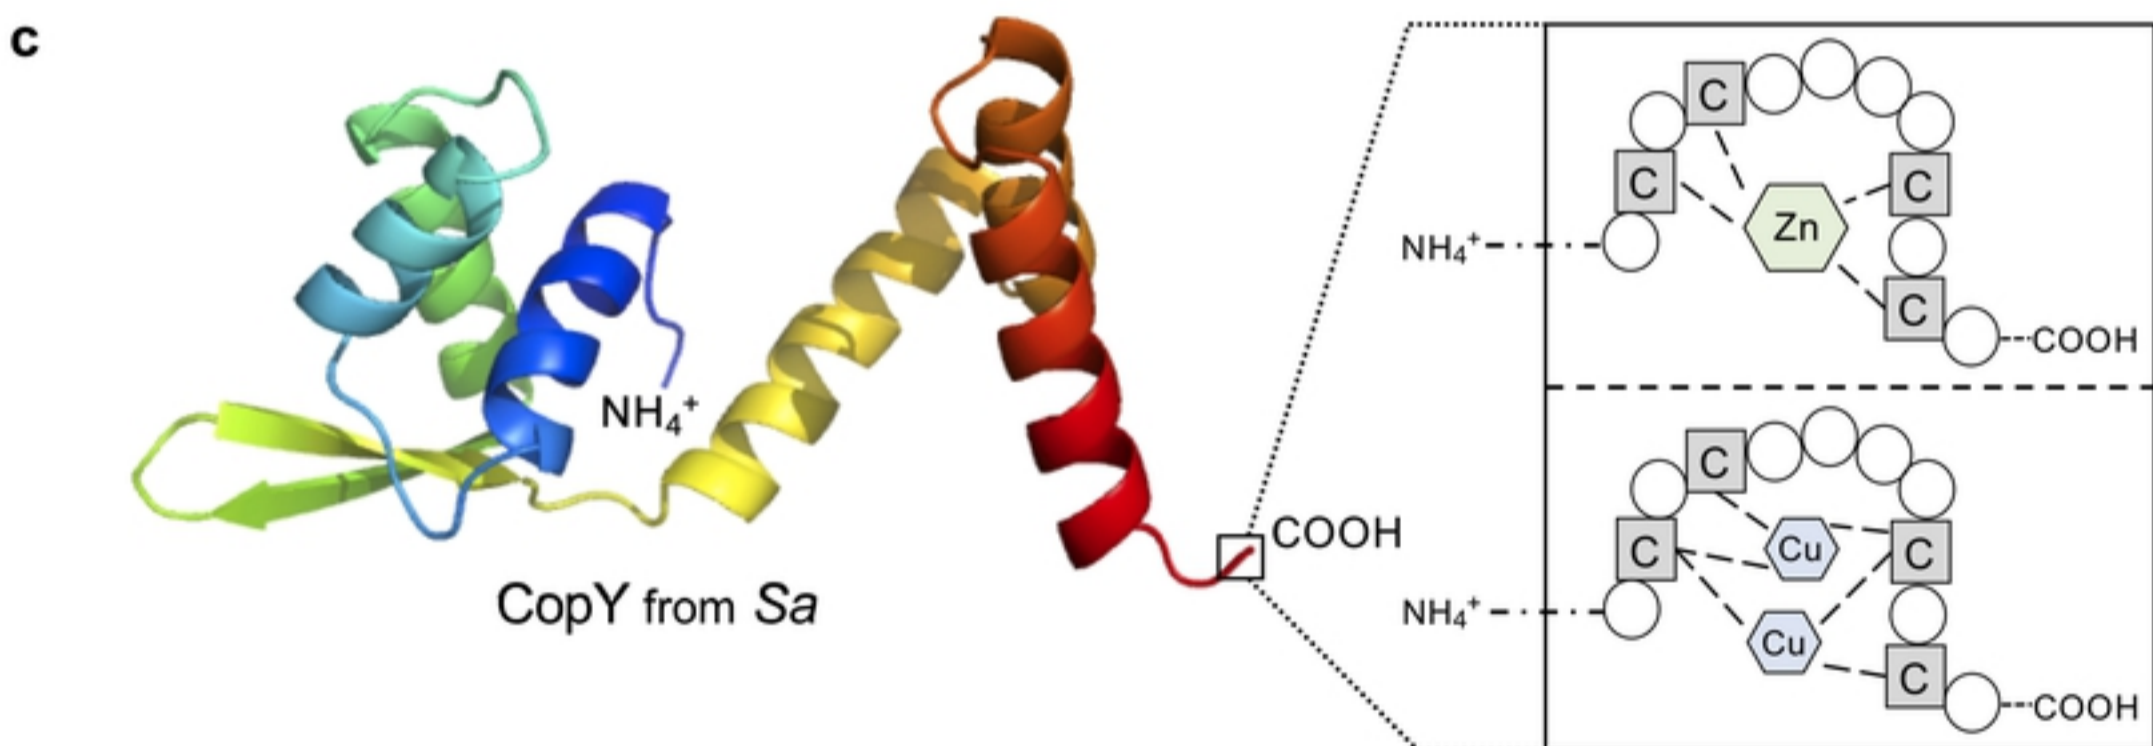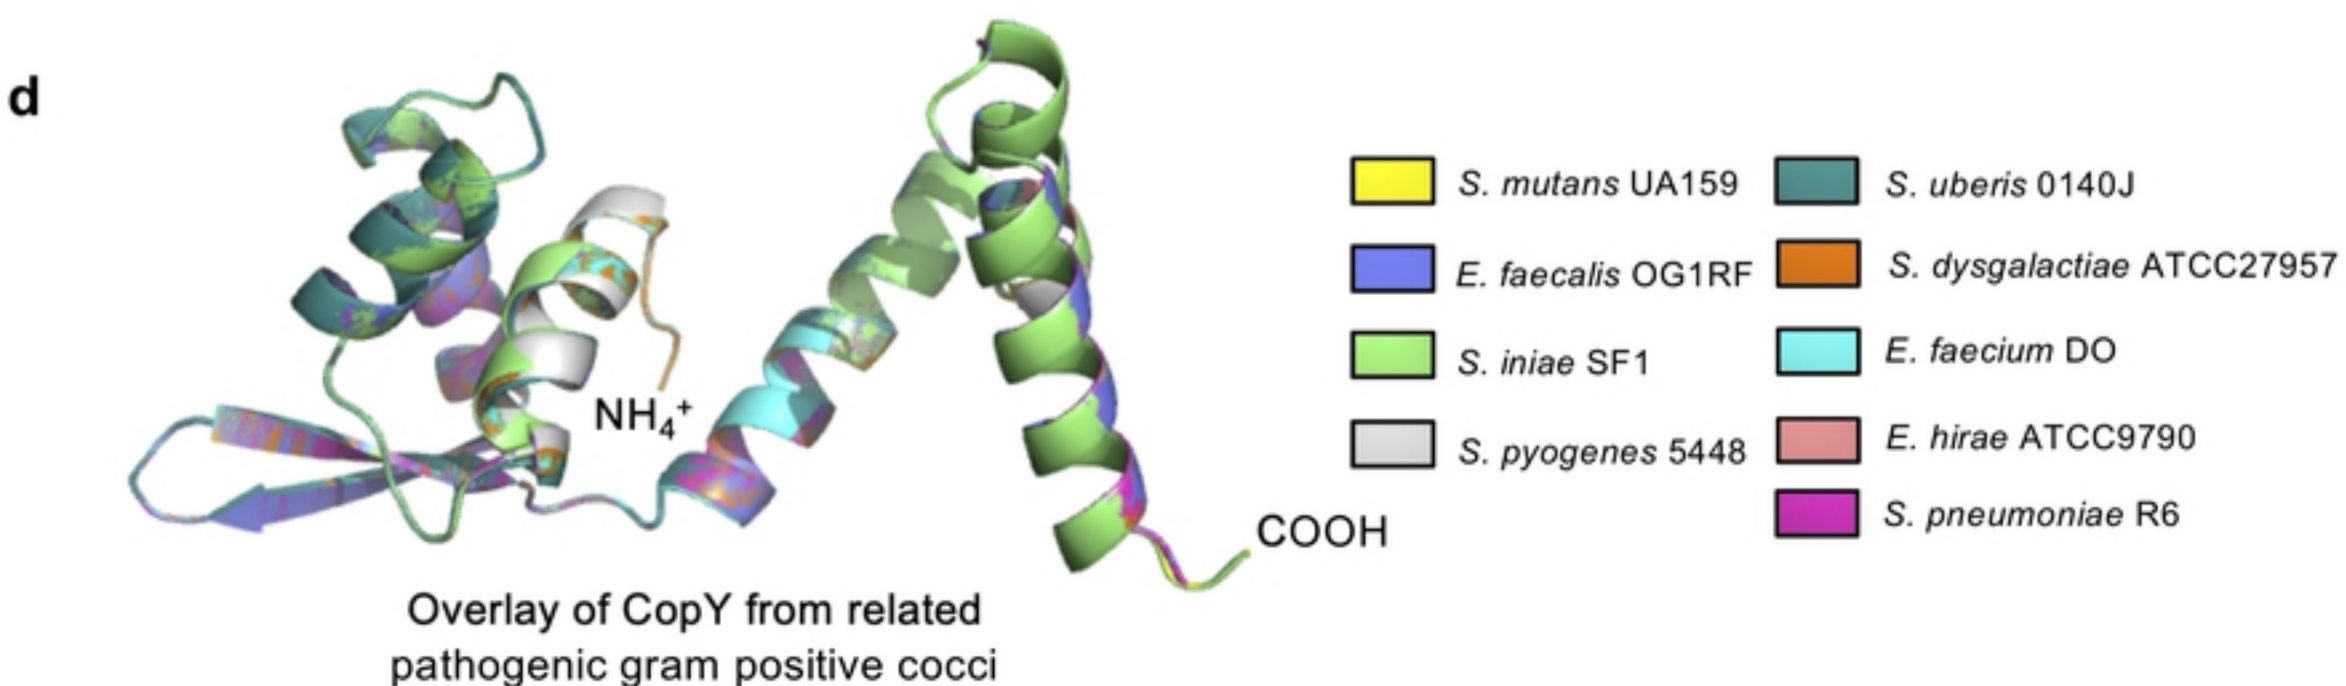

Figure

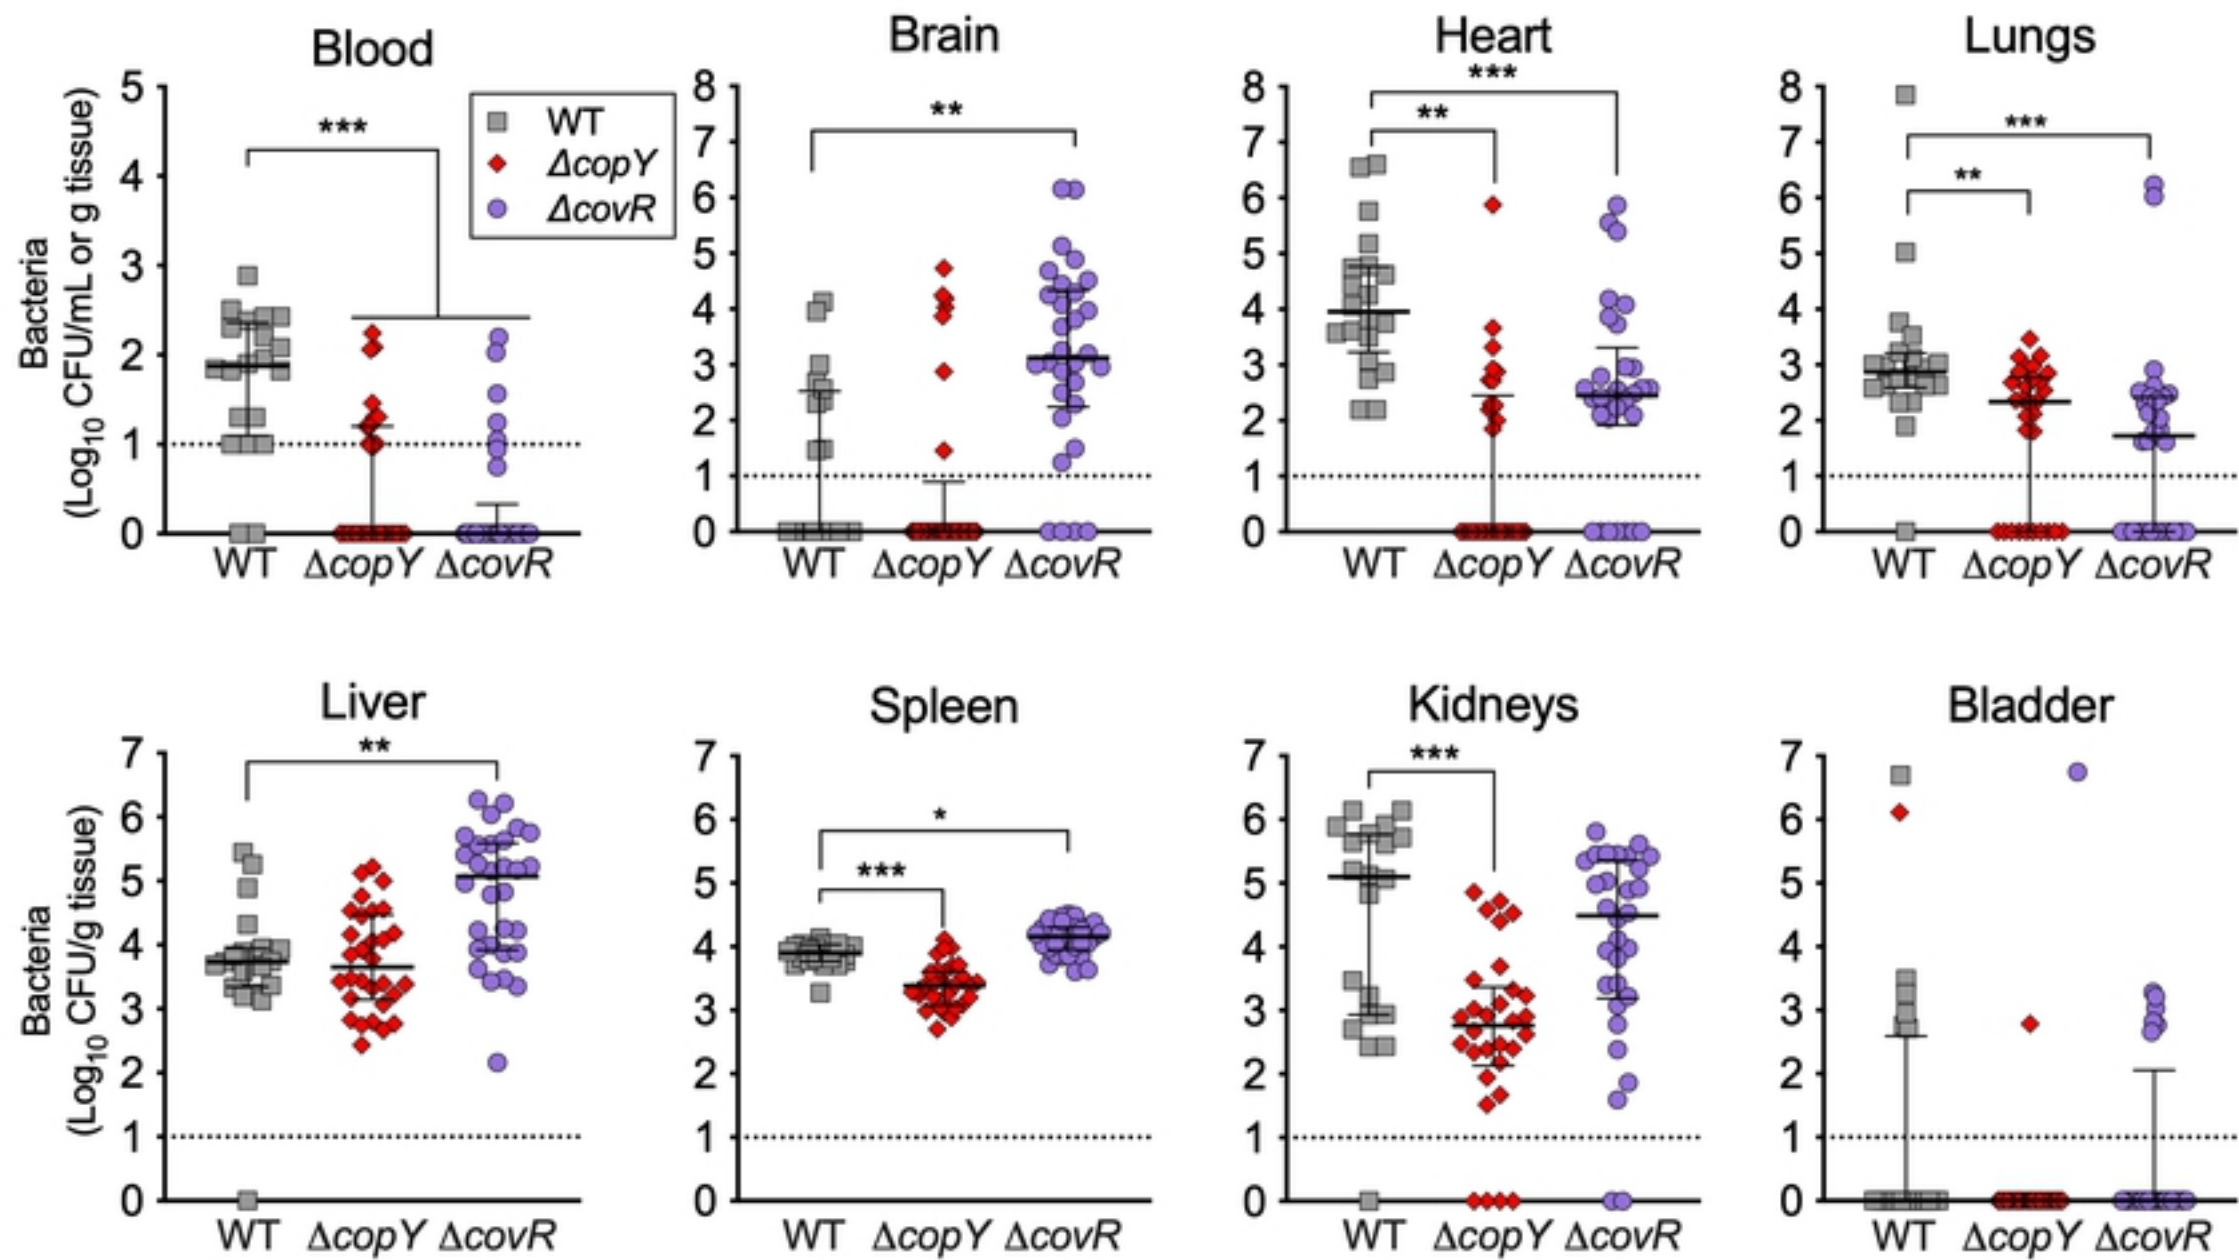

Figure

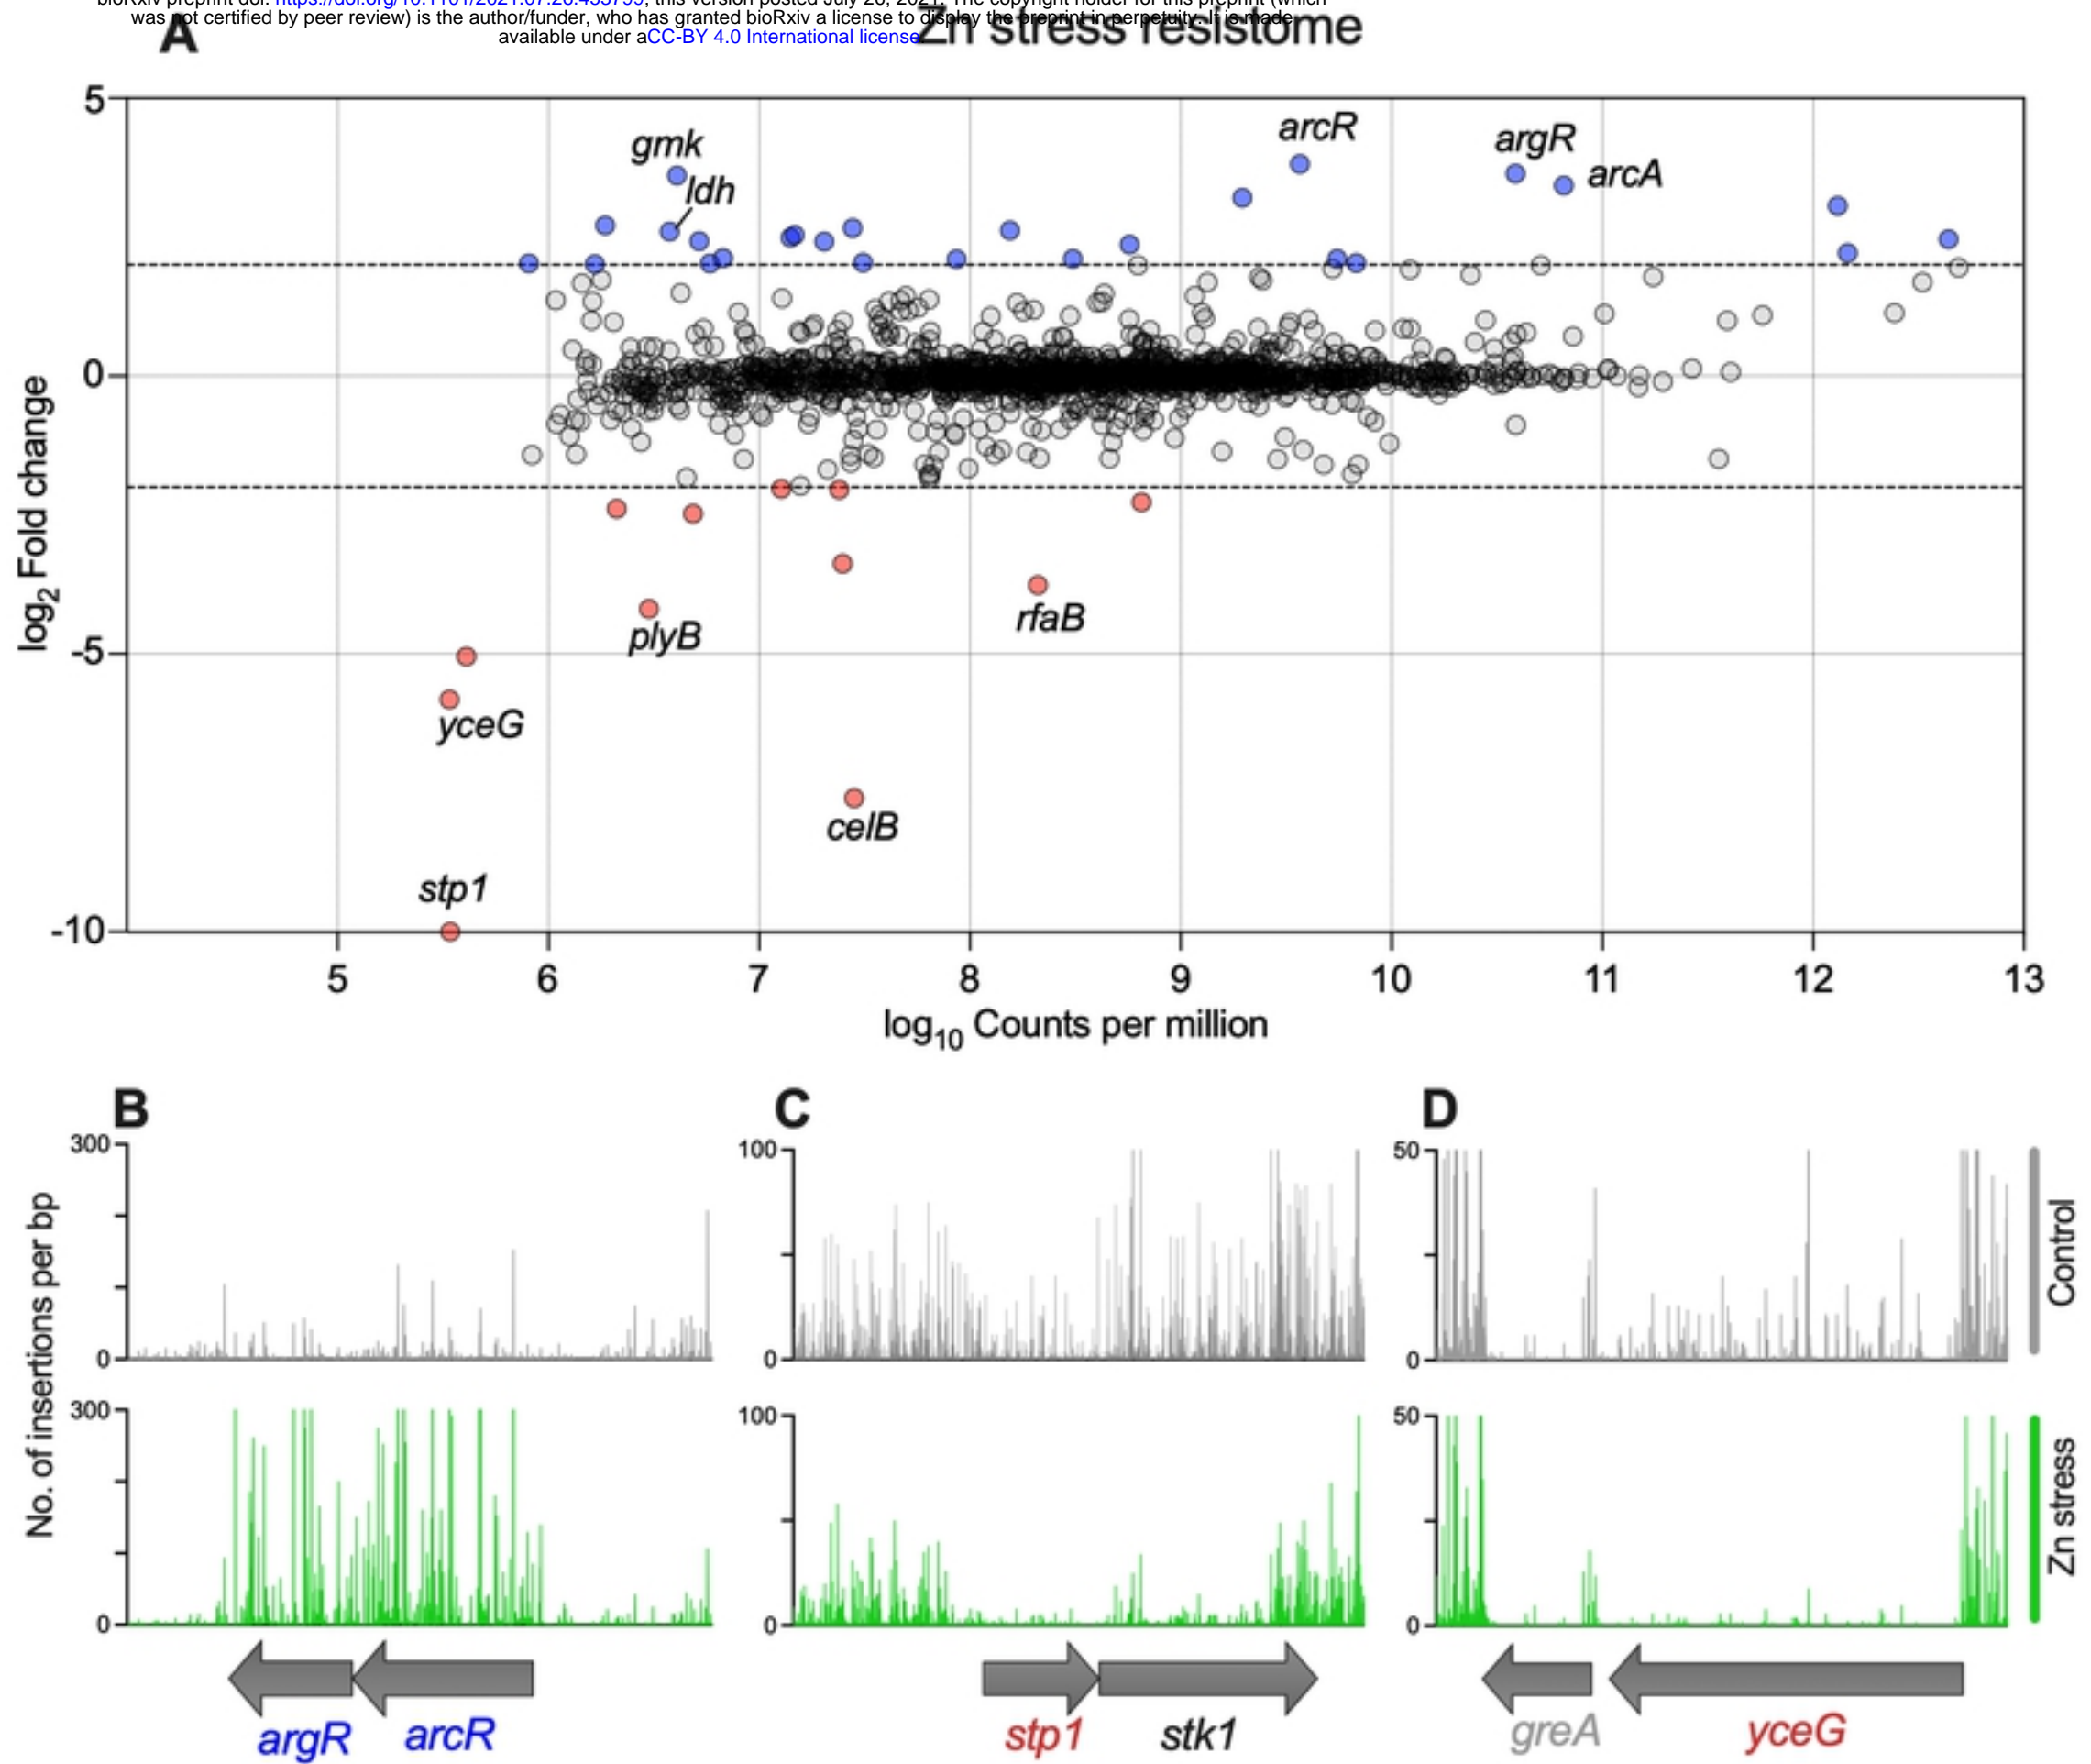

Figure

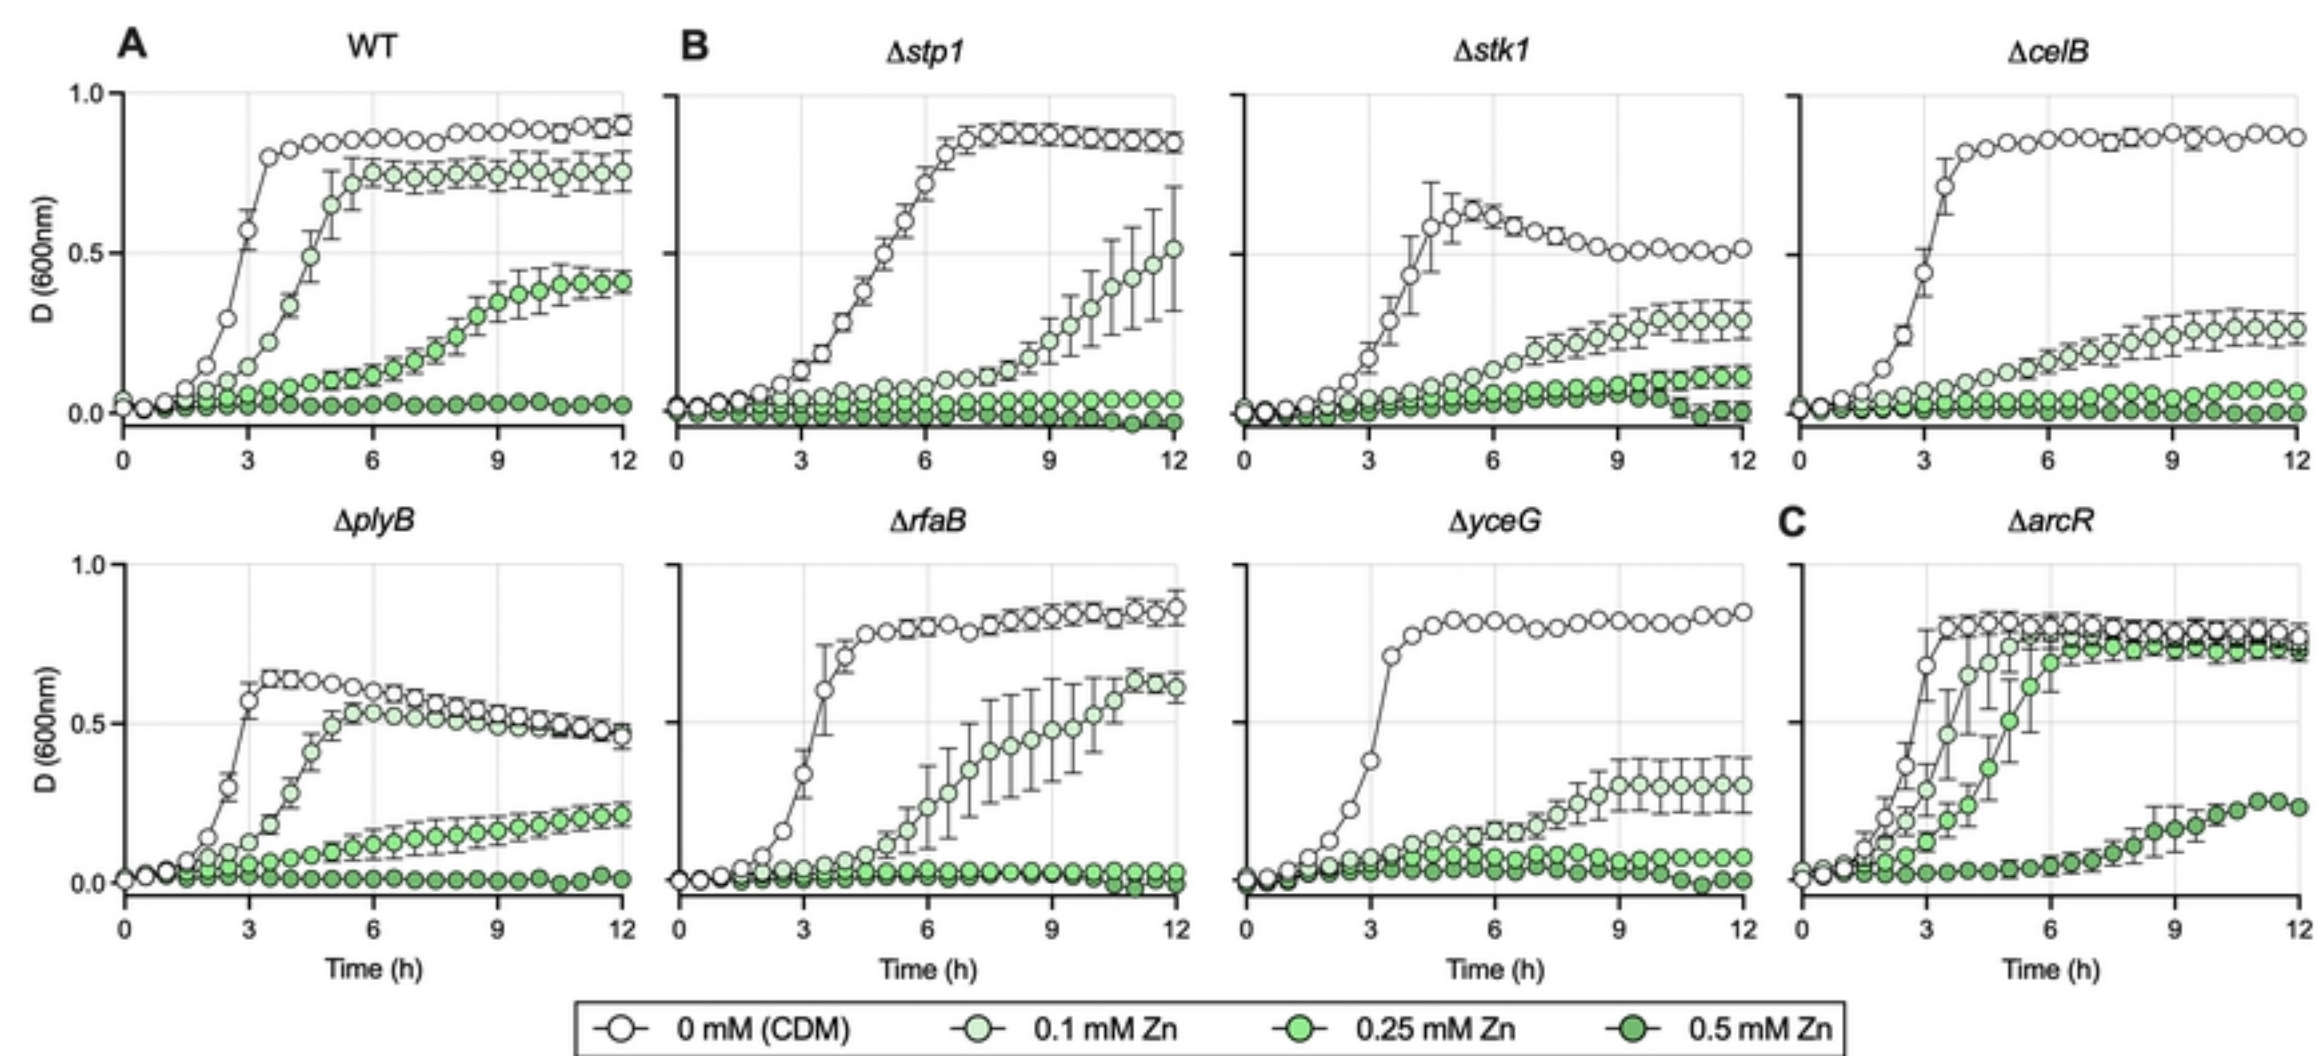

Figure
